43 **SUMMARY STATEMENT**

44 The *Chlamydomonas reinhardtii* formin FOR1 initiates rapid assembly of fertilization  
45 tubule actin filaments from monomers associated with the actin-assembly inhibitor profilin  
46 PRF1.

47

48 **ABSTRACT**

49

50 The regulated assembly of multiple filamentous actin (F-actin) networks from an actin  
51 monomer pool is important for a variety of cellular processes. *Chlamydomonas reinhardtii*  
52 is a unicellular green alga expressing a conventional and divergent actin that is an  
53 emerging system for investigating the complex regulation of actin polymerization. One  
54 actin network that contains exclusively conventional F-actin in *Chlamydomonas* is the  
55 fertilization tubule, a mating structure at the apical cell surface in gametes. In addition to  
56 two actin genes, *Chlamydomonas* expresses a profilin (PRF1) and four formin genes  
57 (FOR1-4), one of which (FOR1) we have characterized for the first time. We found that  
58 unlike typical profilins, PRF1 prevents unwanted actin assembly by strongly inhibiting both  
59 F-actin nucleation and barbed end elongation at equimolar concentrations to actin.  
60 However, FOR1 stimulates the assembly of rapidly elongating actin filaments from PRF1-  
61 bound actin. PRF1 further favors FOR1-mediated actin assembly by potently inhibiting  
62 Arp2/3 complex-mediated actin assembly. Furthermore, *for1* and *prf1-1* mutants, as well  
63 as the small molecule formin inhibitor SMIFH2, prevent fertilization tubule formation in  
64 gametes, suggesting that polymerization of F-actin for fertilization tubule formation is a  
65 primary function of FOR1. Together, these findings indicate that FOR1 and PRF1  
66 cooperate to selectively and rapidly assemble F-actin at the right time and place.

67

68 **INTRODUCTION**

69

70 The actin cytoskeleton is a dynamic system important for diverse cellular processes.  
71 *Chlamydomonas reinhardtii* expresses a single conventional actin, IDA5, with 90%  
72 identity to mammalian actin, as well as an unconventional actin, NAP1 (Kato-Minoura,  
73 1998; Lee et al., 1997), with low identity to mammalian actin (64%). *ida5* mutants have

74 limited phenotypic consequences (Kato-Minoura et al., 1997), likely because NAP1 is  
75 upregulated upon IDA5 perturbation (Hirono et al., 2003, Onishi et al., 2018) and has  
76 compensatory functions (Jack et al., 2019). The presence of a perinuclear F-actin network  
77 has been recently established by both a fluorescent Lifeact peptide (Avasthi et al., 2014,  
78 Onishi et al., 2016) and an optimized phalloidin labeling protocol (Craig and Avasthi,  
79 2019, Craig et al., 2019). Additionally, a population of F-actin also localizes at the base  
80 of the flagella, where it is important for flagellar assembly and proper intraflagellar  
81 transport (Avasthi et al., 2014, Jack et al., 2019). Thus far, cytokinesis has not been  
82 shown to require an F-actin network, as proliferation is Latrunculin B (LatB) and  
83 Cytochalasin D insensitive and *ida5* null mutants produce normal cleavage furrows  
84 (Onishi et al, 2016, Harper et al., 1992, Kato-minoura et al., 1997). Cytokinesis may  
85 instead utilize LatB-insensitive NAP1, which is upregulated during LatB treatment (Onishi  
86 et al., 2016, Onishi et al., 2018). Alternatively, a different mechanism of cytokinesis may  
87 be used in these cells.

88 Another clearly defined F-actin network in *Chlamydomonas* is the fertilization  
89 tubule. The fertilization tubule is an F-actin-rich structure found in mating type plus  
90 gametes (Detmers et al., 1985; Detmers et al., 1983), which during mating protrudes from  
91 the 'doublet zone', a region between the two flagella (Detmers et al., 1983). Phalloidin  
92 staining of F-actin strongly labels fertilization tubules (Detmers et al., 1985), and isolation  
93 of fertilization tubules has revealed actin as a major component (Wilson et al., 1997).  
94 Additionally, null mutants lacking conventional actin cannot form fertilization tubules  
95 (Kato-Minoura, 1997). The context-dependent formation of this well-defined F-actin  
96 structure in *Chlamydomonas* provides an exceptional opportunity to understand how a  
97 cell is capable of precisely regulating its actin cytoskeleton so that actin polymerization  
98 occurs only at a very specific place and time.

99 *Chlamydomonas* expresses a profilin (PRF1) that, like other profilins, inhibits the  
100 nucleation of actin monomers, preventing unwanted actin assembly (Kovar et al., 2001).  
101 We have identified a *Chlamydomonas* formin (FOR1) actin assembly factor, which has  
102 not been characterized and its cellular role in *Chlamydomonas* not yet determined.  
103 Therefore, we sought to characterize the formin FOR1 and determine how FOR1  
104 assembles actin monomers bound to PRF1. Additionally, we wished to determine the role

105 of FOR1 in *Chlamydomonas* cells. We found that in addition to inhibiting nucleation, PRF1  
106 potently inhibits the barbed end elongation of actin filaments at relatively low  
107 concentrations. However, FOR1 overcomes this inhibition and swiftly assembles PRF1-  
108 bound actin monomers into actin filaments that elongate rapidly. *Chlamydomonas* cells  
109 treated with the formin inhibitor SMIFH2 do not form fertilization tubules, nor do *for1* or  
110 *prf1-1* mutants, suggesting that the collective activities of PRF1 and FOR1 regulate acute  
111 F-actin assembly for mating in *Chlamydomonas*.

112

## 113 **RESULTS**

114

### 115 **PRF1 inhibits nucleation and elongation of actin filaments**

116 Plant, fungal, and metazoan cells maintain a large pool of unassembled G-actin bound to  
117 profilin (Carlsson et al., 1977; Kaiser et al., 1999; Lu and Pollard, 2001). Profilin inhibits  
118 the unwanted nucleation of new actin filaments, but once an actin filament has been  
119 formed, profilin-bound actin monomers add to the barbed end of growing actin filaments  
120 to essentially the same degree as free monomers (Pollard and Cooper, 1984).  
121 Additionally, mammalian profilins promote nucleotide exchange (such as ADP to ATP) of  
122 actin, although plant profilins do not (Goldschmidt-Clermont et al., 1991; Mockrin and  
123 Korn, 1980; Perelroizen et al., 1996; Perelroizen et al., 1994).

124 *Chlamydomonas* profilin PRF1 is found throughout the cytoplasm and flagellar  
125 compartments of the cell, but is enriched at the base of the flagella in vegetative cells and  
126 below the fertilization tubule in mating type plus gametes (Kovar et al., 2001). Unlike  
127 typical profilins, *Chlamydomonas* PRF1 inhibits the nucleotide exchange of bound G-actin  
128 (Kovar et al., 2001). PRF1 might therefore inhibit actin assembly in cells more potently  
129 than other profilins. We confirmed that the spontaneous assembly of actin monomers was  
130 inhibited by PRF1 in a concentration-dependent manner (Figure 1A), like other profilins  
131 including fission yeast SpPRF, revealing a relatively high affinity for actin monomers  
132 ( $K_d=0.14 \mu\text{M}$ ). Surprisingly, by directly observing the spontaneous assembly of  $1.5 \mu\text{M}$   
133 Mg-ATP actin monomers using Total Internal Reflection Fluorescence (TIRF) microscopy,  
134 we found that unlike other profilins such as SpPRF, PRF1 also significantly inhibits the  
135 barbed end elongation of actin filaments at concentrations where the ratio of PRF1 to

136 actin is equal or only 2- to 3-fold higher (Figure 1B). Therefore, PRF1 is a multi-faceted  
137 inhibitor of actin polymerization that potently prevents both actin filament nucleation and  
138 elongation.

139 An inhibitory profilin such as PRF1 is ideal to prevent unwanted spontaneous actin  
140 assembly. However, as F-actin is present within the fertilization tubule during mating, F-  
141 actin polymerization must be facilitated at the correct time and place. Therefore, we  
142 speculated that an actin assembly factor such as a formin could be responsible for rapid  
143 actin assembly at fertilization tubule sites.

144

### 145 **Formin identification in *Chlamydomonas reinhardtii***

146 A BLAST search for conserved formin FH2 domain lasso and post sequences using  
147 mouse formin (CAA37668 – aa 986-1251) as query identified a *Chlamydomonas* gene  
148 locus (Cre03.g166700 in the version 5.6 genome assembly) as a candidate formin.  
149 Manual inspection of the genome region upstream of the lasso element revealed an FH1  
150 domain containing at least three proline rich repeats (PRRs) in the same reading frame  
151 with typical 6-8aa spacing between. An additional 7 PRRs with typical short (8-12aa)  
152 spacing were found further upstream of an unusually long spacer of 37 amino acids. A  
153 Kazusa DNA Research Institute EST sequence from *Chlamydomonas* (HCL081g04)  
154 confirmed splicing of the putative FH2 domain to the first three PRRs of the FH1 domain.  
155 A full length cDNA sequence provided by Susan Dutcher (personal communication)  
156 confirmed expression of the long spacer and all 10 PRR regions within a 3157 aa protein  
157 (Figure 2A). This formin was named *Chlamydomonas reinhardtii* formin 1 (FOR1). We  
158 created bacterial expression constructs containing either 3 or 10 PRRs along with the  
159 FH2 domain (FOR1(3P,FH2) or FOR1(10P,FH2), respectively) and confirmed their ability  
160 to stimulate actin polymerization (Figure 2), suggesting that the expressed protein is a  
161 formin. There are three other FH2 domain containing genes in *Chlamydomonas*, which  
162 we have denoted FOR2 (Cre05.g232900), FOR3 (Cre06.g311250), and FOR4  
163 (Cre04.g229163).

164

### 165 **FOR1 efficiently nucleates but weakly elongates actin filaments**

166 Formins are a conserved family of actin assembly factors that nucleate actin filaments.  
167 Additionally, formins increase the F-actin elongation rate in the presence of profilin by  
168 remaining processively associated with the barbed end (Breitsprecher and Goode, 2013).  
169 Formins contain actin assembly FH1 and FH2 domains, which are typically flanked by  
170 regulatory regions. Functional formins are dimers, with two FH2 domains interacting  
171 head-to-tail to create a donut-shaped dimer capable of creating a stable actin 'nucleus'  
172 (Otomo et al., 2005). In addition, the FH2 dimer remains processively associated with the  
173 elongating barbed end of an actin filament (Kovar, 2006). The unstructured FH1 domains  
174 are rich in PRRs that bind to profilin and promote rapid association of profilin-actin with  
175 the barbed end of an elongating filament. To investigate the actin assembly properties of  
176 the formin FOR1, we created a set of constructs containing the FOR1 FH1 and FH2  
177 domains, alone or in combination (Figure 2A). Because our initial inspection of the FOR1  
178 gene suggested that depending upon splicing it contained either 3 or 10 PPRs within its  
179 FH1 domain, we created constructs containing either 3 or 10 PPRs. We focused on  
180 constructs containing solely the FH1 and FH2 domains as full-length formins are difficult  
181 to purify, and active formin constructs containing only the FH1 and FH2 domains have  
182 been extensively studied for numerous formins (Breitsprecher and Goode, 2013).  
183 However, as the C-terminal domains of certain formins have been shown to affect their  
184 actin assembly properties (Gould et al. 2011), it will be interesting in the future to  
185 investigate how FOR1 domains modify FOR1 activity.

186 FOR1's capacity to stimulate actin assembly in the absence of profilin was initially  
187 investigated by measuring the effect of FOR1 on actin polymerization over time using  
188 spontaneous pyrene actin assembly assays. FOR1 containing the FH2 domain alone  
189 (FOR1(FH2)) or both the FH1 and FH2 domains (FOR1(3P,FH2) or FOR1(10P,FH2))  
190 stimulate actin assembly in a nearly identical, concentration-dependent manner (Figure  
191 2B-C), and more potently than a well-characterized control formin fission yeast  
192 Cdc12(FH1,FH2) (Figure 2B-C) (Kovar et al., 2003; Scott et al., 2011). Though these  
193 results reveal that FOR1 increases the overall rate of actin polymerization, spontaneous  
194 pyrene actin assembly assays are unable to differentiate between an increase in the  
195 nucleation and/or elongation of actin filaments.

196 To differentiate between the contributions of nucleation and elongation to the  
197 overall enhanced polymerization rate, we initially examined the effect of FOR1 on actin  
198 filament elongation using seeded pyrene actin assembly assays. In the presence of actin  
199 filament seeds, elongation of the seeds dominates the reaction and the contribution of  
200 nucleation to the overall actin polymerization rate is eliminated. Addition of FOR1(FH2),  
201 FOR1(3P,FH2) or FOR1(10P,FH2) to seeded assembly reactions each reduced the actin  
202 assembly rate in a concentration dependent manner (Figure 2D-E). This result suggests  
203 that FOR1 inhibits actin filament elongation, and that the increased actin assembly rate  
204 observed in spontaneous pyrene actin assays is due to FOR1-mediated nucleation. Fits  
205 of the initial seeded polymerization rates over a range of formin concentrations revealed  
206 dissociation rate constants ( $K_d$ ) for actin filament barbed ends in the low nanomolar range:  
207 FOR1(FH2) ( $K_d=1.6$  nM), FOR1(3P,FH2) ( $K_d=0.17$  nM), FOR1(10P,FH2) ( $K_d=0.24$  nM),  
208 and Cdc12(FH1,FH2) ( $K_d=0.33$  nM) (Figure 2E).

209

### 210 **Fission yeast profilin SpPRF enhances FOR1-mediated actin assembly**

211 In the absence of profilin, *Chlamydomonas* formin FOR1 has potent nucleation activity  
212 but also significantly inhibits actin filament barbed end elongation, similar to the fission  
213 yeast formin Cdc12. However, like other formins (Kovar et al., 2006), Cdc12-associated  
214 filaments elongate their barbed ends ~30-fold faster when fission yeast profilin SpPRF is  
215 included in the reaction (Kovar et al., 2003; Scott et al., 2011). We hypothesized that  
216 profilin would also increase the elongation rate of filaments nucleated by FOR1. We first  
217 tested the ability of profilins PRF1 and SpPRF to bind to the FH1 domains of FOR1 and  
218 Cdc12. Interestingly, although PRF1 binds much more weakly than SpPRF to non-  
219 physiological poly-L-proline (Figure 3A, C) (Kovar et al., 2001), PRF1 and SpPRF have  
220 similar affinities for the FH1 domains of both FOR1 and Cdc12 (Figure 3B,C), all with  
221 dissociation rate constants ( $K_d$ ) within the low micromolar range.

222 Although PRF1 binds well to the FOR1 FH1 domain, the capacity of a formin to  
223 add profilin-actin to filament barbed ends depends on complementary interactions with  
224 profilin and both the FH1 and FH2 domains of the formin (Bestul et al., 2015; Neidt et al.,  
225 2009). We initially tested the ability of FOR1 to assemble SpPRF-actin, as SpPRF is  
226 widely compatible with different formin isoforms (Bestul et al., 2015; Neidt et al., 2009).

227 Spontaneous pyrene actin assembly assays revealed that FOR1 constructs containing  
228 both the FH1 and FH2 domains (FOR1(3P,FH2) and FOR1(10P,FH2)) rapidly accelerate  
229 actin assembly in the presence of SpPRF (Figure 3D-E). Conversely, SpPRF inhibits actin  
230 assembly by FOR1(FH2), the construct lacking the FH1 domain (Figure 3D-E). The  
231 pyrene actin assembly rates measured for FOR1(3P,FH2) and FOR1(10P,FH2) are  
232 significantly greater than those of Cdc12(FH1,FH2) over a range of SpPRF  
233 concentrations (Figure 3E), suggesting that SpPRF dramatically increases the processive  
234 barbed end elongation rate of FOR1-nucleated actin filaments.

235

### 236 **PRF1-actin is utilized specifically by FOR1**

237 We next examined the ability of FOR1 to assemble actin monomers bound to PRF1. In  
238 spontaneous pyrene actin assembly assays, the pyrene fluorescence measured in  
239 reactions containing FOR1 and PRF1 is sharply reduced relative to actin alone or actin in  
240 the presence of FOR1 (Figure 3F). While this could indicate that PRF1 severely inhibits  
241 FOR1-mediated actin assembly, it is also possible that the combination of FOR1 and  
242 PRF1 prevents assembly of actin labeled on Cys-374 with pyrene, as we have described  
243 for other formin and profilin combinations (Kovar et al., 2006; Scott et al., 2011).  
244 Therefore, we directly visualized actin filaments formed in spontaneous pyrene actin  
245 assembly assays in the presence of different combinations of formin and profilin. After  
246 assembling for 600 seconds, the bulk polymerization reactions were stopped by diluting  
247 into TRITC-Phalloidin to allow visualization of filaments by fluorescence microscopy  
248 (Figure 3G). In the absence of profilin, FOR1 produces many small actin filaments  
249 (average length,  $2.7 \pm 4.0 \mu\text{m}$ ), indicative of efficient nucleation by FOR1, as suggested  
250 by spontaneous pyrene actin assembly assays (Figure 2). Additionally, FOR1 facilitates  
251 formation of long actin filaments in the presence of both SpPRF ( $16.6 \pm 10.2 \mu\text{m}$ ) and  
252 PRF1 ( $27.4 \pm 17.5 \mu\text{m}$ ). Interestingly, although FOR1 can utilize either SpPRF or PRF1  
253 to elongate actin filaments, Cdc12 is unable to form long filaments in the presence of  
254 PRF1 (average length,  $4.2 \pm 4.9 \mu\text{m}$ ) (Figure 3G), suggesting that PRF1 is tailored for  
255 elongation by FOR1. Together, these results indicate that FOR1 is capable of efficient  
256 actin filament nucleation, and in the presence of its complementary profilin PRF1, rapidly  
257 elongates these filaments. In addition, the inability of Cdc12 to elongate PRF1-associated



258 actin suggests that FOR1 and PRF1 are tailored to precisely and rapidly polymerize F-  
259 actin.

260

### 261 **FOR1 rapidly and processively elongates actin filaments in the presence of PRF1**

262 To directly examine the effect of PRF1 on FOR1-mediated actin assembly, we visualized  
263 the assembly of 1  $\mu$ M Mg-ATP actin (10% Alexa-488 labeled) over time using TIRF  
264 microscopy. As we found that FOR1(3P,FH2) assembled F-actin to a similar degree as  
265 FOR1(10P,FH2) in several actin assembly assays (Figure 2, 3), we chose to use  
266 FOR1(3P,FH2) in the remainder of our biochemistry experiments. Actin filaments alone  
267 (control) elongate at a rate of 11.5 subunits per second (Figure 4A). In the presence of 1  
268 nM FOR1(3P,FH2), two populations of filaments are observed: actin filaments elongating  
269 at the control rate (9.1 sub/s, red arrowheads), and actin filaments elongating at a  
270 significantly slower rate (0.3 sub/s, blue arrowheads) (Figure 4B). We predict that the  
271 slow-growing filaments are bound at their barbed end by FOR1, which significantly  
272 reduces their elongation, while filaments elongating at the control rate are not bound by  
273 FOR1 (Kovar et al., 2003, Kovar et al., 2006). In the presence of 1 nM FOR1 and 2.5  $\mu$ M  
274 PRF1, two distinct populations of filaments are again observed: actin filaments elongating  
275 at a rate slower than the control rate (4.2 sub/s) and rapidly elongating actin filaments  
276 (63.2 sub/s) (Figure 4C). The assembly rate of internal control filaments is slower in these  
277 reactions because PRF1 inhibits actin filament elongation (Figure 1B), while FOR1 can  
278 efficiently utilize PRF1-bound actin to rapidly elongate actin filaments. The 200-fold  
279 difference between the elongation rate of FOR1-bound F-actin in the absence ( $\sim$ 0.3  
280 sub/s) and presence of PRF1 ( $\sim$ 60 sub/s) is one of the largest observed (Kovar, 2006).

281 Our results suggest that FOR1 and PRF1 cooperate to rapidly elongate F-actin.  
282 To directly visualize and confirm this finding, we made a SNAP-tagged construct of  
283 FOR1(3P,FH2) that was labeled with SNAP-549 dye for multi-color TIRF microscopy  
284 experiments (Figure 5). In the absence of PRF1, SNAP-FOR1(3P,FH2) remains  
285 continuously associated with the barbed end of small, slow growing actin filaments  
286 (Figure 5A, blue arrowheads), consistent with our finding that FOR1 can nucleate actin  
287 filaments but significantly slows actin filament elongation. Conversely, in the presence of

288 PRF1, SNAP-FOR1(3P,FH2)-associated actin filaments elongate rapidly (Figure 5B,D)  
289 compared to control filaments (Figure 5C).

290

### 291 **PRF1 favors formin- over Arp2/3 complex-mediated assembly.**

292 We found that PRF1 potently prevents spontaneous actin assembly by inhibiting both  
293 nucleation and barbed end elongation, whereas FOR1 overcomes this inhibition and  
294 facilitates the assembly of rapidly elongating actin filaments. In addition to enhancing  
295 formin-mediated elongation, profilin has also been shown to tune F-actin network  
296 formation by inhibiting Arp2/3 complex-mediated actin filament branch formation (Rotty  
297 et al., 2015; Suarez et al., 2015). We speculated that PRF1 might be a particularly potent  
298 inhibitor of Arp2/3 complex by inhibiting both branch formation and subsequent  
299 elongation. We tested this possibility by performing biomimetic assays in which fission  
300 yeast Arp2/3 complex activator Wsp1 (Figure 6A, Movie 1) or formin FOR1 (Figure 6C,  
301 Movie 2) are attached to a polystyrene bead within a standard TIRF microscopy chamber.  
302 We sequentially flowed actin alone followed by PRF1-bound actin into the microscopy  
303 chamber to assess the effect of PRF1 on formin- and Arp2/3 complex-mediated actin  
304 assembly. FOR1-bound beads poorly assembled F-actin in the absence of profilin (Figure  
305 6D(1), E(1)), similar to what we observed in standard TIRF microscopy assays (Figure  
306 4B, 5A). Addition of PRF1-actin into the TIRF chamber triggered rapid actin filament  
307 assembly (Figure 6D(2), E(2)). Photobleaching the rapidly assembling F-actin showed a  
308 recurrence of high fluorescence at the bead (Figure 6D(3), F), indicative of rapid actin  
309 filament assembly by FOR1 at the bead surface. Conversely, beads coated with Wsp1  
310 assembled branched actin filaments normally following incubation with actin and Arp2/3  
311 complex (Figure 6A(1), E(1)). However, filament growth was halted following addition of  
312 new actin and Arp2/3 complex with PRF1 (Figure 6B(2), E(2)). Photobleaching of F-actin  
313 revealed very little new F-actin assembly at barbed ends, consistent with PRF1 inhibition  
314 of actin filament elongation. In addition, very little F-actin assembly occurred at the bead,  
315 demonstrating inhibition of Arp2/3 complex-mediated branch formation at the bead  
316 surface (Figure 6B(3), F).

317

### 318 **Fertilization tubule formation is prevented by the formin inhibitor SMIFH2**

319 PRF1 is a potent inhibitor of actin filament nucleation and elongation. However, PRF1-  
320 bound actin can be rapidly assembled by FOR1. We were interested in the role that this  
321 tailored protein interaction plays in facilitating actin polymerization *in vivo*. As the  
322 fertilization tubule in *Chlamydomonas* is known to be F-actin rich and appears by EM to  
323 contain a parallel array of linear actin filaments (Detmers et al., 1983), we suspected that  
324 a formin like FOR1 might assemble the long actin filaments required for fertilization tubule  
325 formation in *Chlamydomonas* gametes. To test this, we first chemically induced  
326 fertilization tubule formation in gametes and stained cells with fluorescent phalloidin to  
327 label F-actin (Figure 7B-H). Fertilization tubules were observed in ~43% of untreated or  
328 DMSO (control)-treated induced gametes (Figure 7B, C and H). As expected, treatment  
329 with 10  $\mu$ M latrunculin B, which depolymerizes F-actin networks, eliminated fertilization  
330 tubules (Figure 7D, H). We then tested whether chemically inhibiting formins would affect  
331 fertilization tubule formation. Formin inhibitor SMIFH2 potently inhibited FOR1-mediated  
332 actin assembly *in vitro* (Figure 7A) (Rizvi et al., 2009). Correspondingly, though 10  $\mu$ M of  
333 formin inhibitor SMIFH2 had little effect on tubule formation (Figure 7E, H), only 5% of  
334 gametes formed fertilization tubules in the presence of 100  $\mu$ M SMIFH2 (Figure 7F, H).  
335 To confirm that fertilization tubule loss with 100  $\mu$ M SMIFH2 is specific, we also treated  
336 cells with 100  $\mu$ M of Arp2/3 complex inhibitor CK-666 (Nolen et al., 2009). Similar to  
337 controls, ~40% of CK-666 cells formed fertilization tubules (Figure 7G, H), indicating that  
338 FOR1-mediated but not Arp2/3 complex-mediated F-actin assembly is required for  
339 fertilization tubule formation. Furthermore, we also found that FOR1 is capable of  
340 bundling actin filaments to a similar extent as fission yeast formin Fus1, the formin  
341 involved in mating projectile formation in fission yeast cells (Figure S1), suggesting that  
342 in addition to assembling actin filaments, FOR1 could potentially also be involved in  
343 bundling actin filaments in the fertilization tubule.

344

345

### 346 **FOR1 and PRF1 mutants fail to form fertilization tubules**

347 SMIFH2 inhibition of fertilization tubule formation suggests that a formin is required to  
348 assemble F-actin within the fertilization tubule. However, SMIFH2 is a pan-formin inhibitor  
349 that likely has more than one formin target and may have additional non-specific targets

350 as well. As *Chlamydomonas* has four putative formin genes, we wished to determine  
351 whether FOR1 specifically assembles F-actin for fertilization tubule formation. Several  
352 mutants containing insertions in the FOR1 coding sequence were available from the  
353 *Chlamydomonas* mutant library (<https://www.chlamylibrary.org>). We chose to analyze a  
354 mutant with an insertion in exon 3 (Figure 8A, B), upstream of the FH1 and FH2 domains  
355 in FOR1. Disruption of FOR1 was confirmed the absence of FH2 domain expression  
356 (Figure 8C). In activated wild-type gametes, cells form long fertilization tubules between  
357 flagella in 89% of cells (N=200) (Figure 8D). In *for1* insertional mutants, gametes retained  
358 their perinuclear actin structures (Figure 8E, E', and E''), but began to deform in the region  
359 where fertilization tubule extension normally takes place, with no tubule protrusion (Figure  
360 8E', E'', white arrows). Sometimes, a filamentous actin focus could be seen at the tip of  
361 the deformation (Figure 8E', white arrowhead). These genetic data confirm that FOR1 is  
362 required for normal actin filament assembly in fertilization tubules. In the absence of this  
363 formin, attempts to form a tubule cause morphological defects at the apical surface of  
364 activated gametes. We also tested the ability of mutants of two other formins to make  
365 fertilization tubules. *For2* mutants also exhibited a defect in tubule formation but to a  
366 reduced extent than *for1* mutants, as some cells could still make tubules (Figure S2A-E).  
367 Because these cells did not show a complete loss of tubules, we tested the functional  
368 effects of tubule reduction and found reduced rates of cell fusion (Figure S2F). In contrast,  
369 *for3* mutants showed no differences in tubule formation from the wild type (Figure S3).  
370 No mutants with an insertion in the coding region of FOR4 were available in the  
371 *Chlamydomonas* mutant library. Our data suggest that while FOR2 may also be involved  
372 in fertilization tubule formation or maintenance, FOR1 is the primary formin required for  
373 proper fertilization tubule formation.

374 To further characterize the importance of the formin-profilin interaction on  
375 fertilization tubule formation in vivo, we tested whether a temperature-sensitive mutant of  
376 PRF1 (*prf1-1*) (Tulin and Cross, 2014; Onishi et al. 2018) was capable of forming  
377 fertilization tubules. It has been previously demonstrated that little PRF1 is detectable  
378 even at the permissive temperature in *prf1-1* mutants (Onishi et al., 2018).  
379 Correspondingly, *prf1-1* mutants showed a complete inability to generate fertilization  
380 tubules compared to wild-type controls at both the permissive and restrictive

381 temperatures (Figure 9). However, PRF1 is thought to protect monomeric conventional  
382 actin IDA5 from degradation in *Chlamydomonas*, as IDA5 protein is lost and NAP1  
383 upregulated at the permissive temperature in *prf1-1* mutants (Onishi et al., 2018). Given  
384 that IDA5 is required for fertilization tubule formation (Kato-Minoura et al., 1997), the *prf1-1*  
385 mutant phenotype may also be attributable to the loss of IDA5. We additionally tested  
386 whether a temperature-sensitive mutant of the unconventional actin NAP1 (*nap1*) (Onishi  
387 et al., 2016) was capable of forming fertilization tubules. We found that mutants of NAP1  
388 (in which IDA5 expression is abundant) showed no defect in fertilization tubule formation  
389 (Figure S4). While NAP1 was previously observed within fertilization tubules using NAP1-  
390 specific antibodies (Hirono et al., 2003) this population seems inessential for tubule  
391 formation.

392

393

## 394 **Discussion**

395

### 396 **PRF1 as a regulator of F-actin assembly**

397 We found that, unlike typical profilins that primarily inhibit only the nucleation of new actin  
398 filaments, PRF1 is an unusual profilin, which, at relatively low concentrations, dramatically  
399 prevents actin assembly by inhibiting both the nucleation and barbed end elongation of  
400 actin filaments. This effect on actin filament elongation is likely due to an enhanced affinity  
401 of PRF1 for the actin filament barbed end. Other profilins have also been shown to  
402 decrease barbed end elongation (Pernier et al., 2016, Courtemanche and Pollard, 2013),  
403 though at concentrations that are 5-10 times higher than PRF1 (Figure 1B). The  
404 enhanced affinity of PRF1 for the barbed end compared to other profilins could make it  
405 an ideal tool to study the mechanism and importance of profilin's competition with other  
406 barbed end ABPs (Pernier et al., 2016) such as formin, capping protein, gelsolin, and  
407 Ena/VASP. As PRF1 inhibits nucleation, elongation, and the ADP-to-ATP exchange of  
408 bound actin monomers (Kovar et al., 2001), PRF1 is a tight regulator of the actin monomer  
409 pool, inhibiting spontaneous actin filament assembly in the cell.

410         Though PRF1 prevents spontaneous actin assembly, FOR1 overcomes the  
411 inhibitory effect of PRF1 and utilizes PRF1-bound actin to rapidly assemble actin

412 filaments for the fertilization tubules in mating gametes. We have previously shown that  
413 the particular profilin defines the rate of formin-mediated actin assembly (Neidt et al.,  
414 2009). The presence of tailored formin-profilin pairs (Bestul et al., 2015) suggests that  
415 this interaction is crucial for controlling utilization of an actin monomer pool. The  
416 *Chlamydomonas* profilin PRF1 appears to be an extreme example of this, as PRF1-bound  
417 actin does not nucleate or elongate well in the absence of FOR1. The other  
418 *Chlamydomonas* formins may nucleate and/or elongate PRF1-bound actin to different  
419 extents, promoting proper regulation of the profilin-actin pool toward assembly of specific  
420 F-actin networks. As our in vitro assays utilize animal actin, it is also possible that the  
421 profilin and formins from *Chlamydomonas* interact differently with conventional and/or  
422 unconventional *Chlamydomonas* actin than with the animal actin present in our assays.  
423 The FH2 domain of formin binds within the hydrophobic cleft between actin subdomains  
424 1 and 3 (Otomo et al. 2005). Of the 11 residues that line the hydrophobic cleft, 100% are  
425 conserved in IDA5. In NAP1, 8 of the residues are conserved and 2 are similar amino  
426 acids (Figure S5). Of the 21 actin residues that contact profilin (Schutt et al., 1993), 15  
427 are conserved in NAP1 and an additional three are strongly similar amino acid  
428 substitutions. The differences between the unconventional NAP1 and the conventional  
429 *Chlamydomonas* actin add another layer to the complex regulation of actin assembly in  
430 this organism. Future work will involve deciphering how the formins utilize both the  
431 conventional and unconventional actins in *Chlamydomonas* to promote specific cellular  
432 processes.

433         Conversely, PRF1 inhibits Arp2/3 complex-mediated actin assembly (Figure 6).  
434 Inhibition of Arp2/3 complex-mediated branch formation and elongation could further bias  
435 *Chlamydomonas* towards FOR1-mediated assembly, by preventing competition for actin  
436 monomers (Suarez and Kovar, 2016; Suarez et al., 2015). *Chlamydomonas* contains  
437 ARP2 and ARP3, but its activators have not been identified (Kollmar et al., 2012). The  
438 Arp2/3 complex may be involved in assembly and maintenance of the F-actin involved in  
439 flagellar membrane or protein trafficking, as treatment with Arp2/3 complex inhibitor CK-  
440 666 induces flagellar shortening (Avasthi et al., 2014). The presence of multiple potential  
441 F-actin networks provides the possibility that other F-actin assembly factors are also

442 present in *Chlamydomonas*. If so, PRF1 may be involved in regulating competition for  
443 actin monomer by these different assembly factors.

444 In addition to regulating a balance between FOR1- and Arp2/3 complex-mediated  
445 F-actin assembly, PRF1 also likely regulates both conventional actin and NAP1  
446 dynamics. Both SMIFH2 (data not shown) and CK-666 (Avasthi et al., 2014) affect  
447 flagellar length in mutants lacking conventional actin in which NAP1 is upregulated. This  
448 finding suggests that both formin and Arp2/3 complex can nucleate NAP1 filaments.  
449 Unlike SMIFH2 and CK-666, latrunculin and cytochalasin do not affect NAP1, which may  
450 explain why those treatments do not inhibit cytokinesis. Future work will involve  
451 determining the nature of the F-actin networks involved in cytokinesis and flagellar protein  
452 trafficking as well as PRF1's role in ensuring proper F-actin distribution to each network.

453

#### 454 **FOR1 in fertilization tubule formation**

455 FOR1 appears to be required for fertilization tubule formation as both *for1* mutants and  
456 wild-type gametes treated with the formin inhibitor SMIFH2 do not form fertilization  
457 tubules. Fertilization tubule formation in *Chlamydomonas* occurs near the membrane at  
458 a site between the two flagella. Prior to fertilization tubule formation, this site is  
459 characterized by two parallel electron-dense regions called the membrane zone  
460 (immediately adjacent to the membrane) and doublet zone (slightly interior) (Detmers et  
461 al., 1983; Goodenough and Weiss, 1975). In a mature fertilization tubule, the pointed ends  
462 of actin filaments are attached at the doublet zone (Detmers et al., 1983) while the  
463 membrane zone is present at the far end of the extended fertilization tubule, near the F-  
464 actin barbed ends. As formins are frequently membrane-anchored, FOR1 is potentially  
465 localized to the membrane zone, which extends away from the doublet zone following F-  
466 actin formation. FOR1 could additionally be important for bundling the actin filaments in  
467 the fertilization tubule (Figure S1), creating a stable projection. Future work will involve  
468 determining the factors that regulate FOR1 activity and other ABPs that are involved in  
469 proper organization of F-actin at that site.

470

#### 471 **ACKNOWLEDGEMENTS**

472

473 We thank Susan Dutcher (Washington University in St. Louis) and Bill Snell (UT  
474 Southwestern) for helpful discussions, including confirmation that *Chlamydomonas*  
475 expresses FOR1. We thank Megan Rhyne (University of Tennessee, Knoxville) for helpful  
476 comments. This work was supported by National Institutes of Health grants R01  
477 GM079265 (to D.R.K.), P20 GM104936 (to P.A.), NSF Graduate Student Fellowship  
478 DGE-1144082 (to J.R.C.), Molecular and Cellular Biology Training Grant T32 GM007183  
479 (to J.R.C. and C.T.S.), and MSTP Training Grant T32GM007281 (to M.J.G.).

480

#### 481 **COMPETING INTERESTS**

482 The authors declare no competing interests.

483

#### 484 **AUTHOR CONTRIBUTIONS**

485 Conceptualization: JRC, MJG, LJM, PA, DRK; Methodology: JRC, MJG, LJM, DRK, PA;  
486 Data collection and analysis: JRC, MJG, EWC, DMM, YL, JAS, CTS, SH; Writing-original  
487 draft preparation: JRC, MG, PA; Writing-reviewing and editing: JRC, EWC, DMM, PA,  
488 DRK; Funding acquisition: JRC, DRK, PA; Resources: LJM, DRK, PA; Supervision: DRK,  
489 PA.

490

#### 491 **METHODS**

492

##### 493 **Plasmid construction**

494 Constructs containing different components of the formin actin assembly domains (FH1  
495 and FH2) were prepared for bacterial expression. The preparation of Cdc12(FH1FH2)  
496 and Cdc12(FH1) constructs has been described (Neidt et al., 2009). The FOR1 domain  
497 constructs were designed based on sequence analysis of the *Chlamydomonas* genome,  
498 and Expressed Sequence Tag analysis by Susan Dutcher (Washington University, St.  
499 Louis), and were optimized for bacterial expression and custom synthesized (DNA 2.0,  
500 Newark, California). Constructs were designed by SnapGene software (from GSL  
501 Biotech; available at [snapgene.com](http://snapgene.com)). All constructs were prepared by standard cloning  
502 procedures, consisting of PCR amplification (iProof, Bio-Rad Laboratories) from the  
503 commercially prepared DNA. Restriction enzyme cleavage sites and 6x His sequences



504 were included in the reverse primers. PCR products were cloned using restriction  
505 enzymes into pET21a (EMD Biosciences) for expression. All amplified sequences were  
506 confirmed by sequencing.

507

### 508 **Protein purification**

509 All constructs of FOR1 and PRF1 were expressed in BL21-Codon Plus (DE3)-RP (Agilent  
510 Technologies, Santa Clara, CA). Cdc12(FH1FH2) (Kovar and Pollard, 2004), SpPRF (Lu  
511 and Pollard, 2001), SpFus1 (Scott et al., 2011), and PRF1 (Kovar et al., 2001) were  
512 purified as described previously. FOR1 constructs were His-tag affinity purified. FOR1  
513 constructs were expressed with 0.5 mM isopropyl  $\beta$ -D-thiogalactopyranoside (IPTG;  
514 Sigma-Aldrich) for 16 hours at 16°C. Cells were resuspended in extraction buffer (50 mM  
515  $\text{NaH}_2\text{PO}_4$ , pH 8.0, 500 mM NaCl, 10% glycerol, 10 mM imidazole, 10 mM  
516  $\beta$ -mercaptoethanol [ $\beta$ ME]) supplemented with 0.5 mM phenylmethylsulfonyl fluoride  
517 (PMSF) and protease inhibitors, sonicated, and homogenized in an Emulsiflex-C3  
518 (Avestin, Ottawa, ON, Canada). The homogenate was spun and clarified at 30,000g for  
519 15 minutes, then 50,000g for 30 minutes and incubated with Talon Metal Affinity Resin  
520 (Clontech, Mountain View, CA) for 1 hour at 4°C. The resin was loaded onto a disposable  
521 column and washed with 50 mL wash with extraction buffer. FOR1 was then eluted with  
522 Talon elution buffer (50 mM  $\text{NaH}_2\text{PO}_4$ , pH 8.0, 500 mM NaCl, 10% glycerol, 250 mM  
523 imidazole, 10 mM  $\beta$ ME) and dialyzed into formin buffer (20 mM HEPES, pH 7.4, 1 mM  
524 EDTA, 200 mM KCl, 0.01%  $\text{NaN}_3$ , and 1 mM DTT).

525  $A_{280}$  of purified proteins was taken using a Nanodrop 2000c Spectrophotometer  
526 (Thermo-Scientific, Waltham, MA). Protein concentrations were determined based on  
527 extinction coefficients estimated from amino acid sequences using ProtParam  
528 (<http://web.expasy.org/protparam/>), or from previous studies: PRF1: 19,190  $\text{M}^{-1}$  (Kovar et  
529 al., 2001), SpPRF: 20,065  $\text{M}^{-1}$  (Lu and Pollard, 2001), FOR1(10P,FH2): 29,450  $\text{M}^{-1}$ ,  
530 FOR1(3P,FH2): 24,200  $\text{M}^{-1}$ , FOR1(FH2): 24,400  $\text{M}^{-1}$ , SNAP-FOR1(3P,FH2): 44,920  $\text{M}^{-1}$ ,  
531 and Cdc12 (FH1,FH2): 51,255  $\text{M}^{-1}$  (Kovar et al., 2003). Protein concentrations of FH1  
532 constructs Cdc12(FH1), FOR1(FH1) , and FOR1(3P) were determined by  $A_{205}$  in water  
533 ( $[(A_{205}\text{FH1} - A_{205}\text{buffer})/30]/\text{mol wt}$ ). Proteins were flash-frozen in liquid nitrogen and kept

534 at -80°C. SNAP-FOR1(3P,FH2) protein was labeled with SNAP-549 dye (New England  
535 Biolabs, Ipswich, MA) as per manufacturer's instructions prior to each TIRF experiment.

536 Actin was purified from rabbit or chicken skeletal muscle actin as previously  
537 described (Spudich and Watt, 1971). For pyrene assembly assays, actin was labeled with  
538 N-(1-Pyrene)iodoacetamide (Life Technologies, Carlsbad, CA) on Cys-374. As the  
539 combination of FOR1 in the presence of PRF1 selected against actin labeled on Cys-374,  
540 actin labeled with Alexa Fluor 488 on lysines (ThermoFisher Scientific, Waltham, MA)  
541 was used for TIRF microscopy experiments.

542

### 543 **Pyrene assembly and disassembly assays**

544 All pyrene assembly and disassembly assays were carried out in a 96-well plate, and the  
545 fluorescence of pyrene-actin (excitation at 364 nm and emission at 407 nm) was  
546 measured with a Spectramax Gemini XPS (Molecular Devices) or Safire2 (Tecan)  
547 fluorescent plate reader as described (Zimmermann et al., 2016). For spontaneous  
548 assembly assays, a 15 µM mixture of 20% pyrene-labeled Mg-ATP-actin monomer with  
549 100X anti-foam 204 (0.005%; Sigma) was placed in the upper well of a 96 well non-  
550 binding black plate. Formin and/or profilin, 10X KMEI (500 mM KCl, 10 mM MgCl<sub>2</sub>, 10 mM  
551 ethylene glycol tetraacetic acid [EGTA], and 100 mM imidazole, pH 7.0), and Mg-Buffer  
552 G (2 mM Tris, pH 8.0, 0.2 mM ATP, 0.1 mM MgCl<sub>2</sub> and 0.5 mM DTT) were placed in the  
553 lower row of the plate. Reactions were initiated by mixing contents of the lower wells the  
554 actin monomers in the upper wells with a twelve-channel pipetman (Eppendorf). For  
555 pyrene assembly assays involving SMIFH2, SMIFH2 was added to the lower wells  
556 containing FOR1 prior to mixing the upper and lower wells.

557 For seeded assembly assays, 5.0 µM unlabeled Mg-ATP-actin was preassembled  
558 in the upper row of the plate, followed by addition of anti-foam, formin and/or profilin, and  
559 Mg-Buffer G. A 2.0 µM mixture of 20% pyrene-labeled actin with Mg-Buffer G was placed  
560 in the lower plate row. Mixing actin monomers in lower wells with pre-assembled actin  
561 filaments in upper wells initiated reactions.

562 For depolymerization assays, a 5.0 µM mixture of unlabeled and 50% pyrene-  
563 labeled Mg-ATP-actin monomers was preassembled in the upper row of the plate for two  
564 hours, followed by addition of anti-foam. Formin, 10X KMEI and Mg-Buffer G were placed

565 in the lower plate row. Reactions were initiated by mixing lower wells with upper wells,  
566 diluting the pre-assembled filaments to 0.1  $\mu$ M.

567

### 568 **Profilin FH1 affinity assays**

569 The affinity of profilin for formin(FH1) was determined by measuring the change in  
570 profilin's intrinsic tryptophan fluorescence by excitation at 295 nm and emission at 323  
571 nm (Perelroizen et al., 1994; Petrella et al., 1996). Profilin (1.0  $\mu$ M) was incubated with a  
572 range of poly-L-proline or formin(FH1) concentrations for 30 min, then profilin  
573 fluorescence was read in a Safire2 fluorescence plate reader and plotted versus  
574 formin(FH1) concentration. The fluorescence of formin(FH1) alone was subtracted from  
575 the fluorescence in the presence of profilin. Dissociation constants ( $K_d$ ) were determined  
576 by fitting a quadratic function to the dependence of the concentration of bound profilin on  
577 the concentration of formin(FH1).

578

### 579 **Polymerization and depolymerization rate determination**

580 Actin assembly rates were determined from spontaneous assembly reactions by  
581 measuring the slopes of actin assembly following the lag phase to 50% of total actin  
582 assembly. Assembly rates from preassembled actin seeds were determined by a linear  
583 fit to the first 100 seconds of assembly. Depolymerization rates were determined by a  
584 linear fit to the first 100-300 seconds of the reaction.

585 The affinity of FOR1 for barbed ends was determined as previously described  
586 (Kovar *et al.*, 2003). We fit the plot of the dependence of the assembly or disassembly  
587 rate on formin concentration using the equation  $V_i = V_{if} + (V_{ib} - V_{if}) / ((K_d + [\text{ends}] + [\text{formin}]$   
588  $- \sqrt{((K_d + [\text{ends}] + [\text{formin}])^2 - 4[\text{ends}][\text{formin}]) / 2[\text{ends}]})$ ), where  $V_i$  is the observed  
589 elongation or depolymerization rate,  $V_{if}$  is the elongation or depolymerization rate of free  
590 barbed ends,  $V_{ib}$  is the elongation or depolymerization rate of bound barbed ends,  $[\text{ends}]$   
591 is the concentration of barbed ends, and  $[\text{formin}]$  is formin concentration. The nucleation  
592 efficiency was calculated by dividing the slope of the spontaneous assembly rate by  $k+$   
593 in the absence and presence of profilin and dividing by the formin concentration (Kovar  
594 et al., 2006). Depolymerization rates are normalized to the rate of actin assembly alone  
595 and expressed as a percent of the standard actin assembly rate.

596

### 597 **Fluorescence micrographs (rhodamine phalloidin)**

598 Unlabeled Mg-ATP-actin was assembled as per standard spontaneous assembly  
599 reactions. Actin filaments were then incubated with 1  $\mu$ M TRITC-Phalloidin (Fluka  
600 Biochemika, Switzerland) for 5 minutes. Reactions were terminated by diluting assembled  
601 filaments in fluorescence buffer (50 mM KCl, 1 mM MgCl<sub>2</sub>, 100 mM DTT, 20  $\mu$ g/ml  
602 catalase, 100  $\mu$ g/ml glucose oxidase, 3 mg/ml glucose, 0.5% methylcellulose, and 10 mM  
603 imidazole, pH 7.0) and were absorbed to coverslips coated with 0.05  $\mu$ g/ $\mu$ l poly-L-lysine.  
604 Fluorescence microscopy images were collected on an Olympus IX-81 microscope and  
605 cooled CCD camera (Orca-ER, Hamamatsu).

606

### 607 **Low-speed sedimentation assays**

608 Sedimentation assays were performed as previously described (Zimmermann et al.,  
609 2016). 15  $\mu$ M Mg-ATP actin monomers were spontaneously assembled for 1 hour in 10  
610 mM imidazole, pH 7.0, 50 mM KCl, 5 mM MgCl<sub>2</sub>, 1 mM EGTA, 0.5 mM DTT, 0.2 mM ATP  
611 and 90  $\mu$ M CaCl<sub>2</sub> to generate F-actin. Filamentous actin was then incubated with FOR1  
612 or SpFus1 for 20 minutes at 25°C and spun at 10,000g at 25°C. Supernatant and pellets  
613 were separated by 15% SDS-PAGE gel electrophoresis and stained with Coomassie Blue  
614 for 30 minutes, destained for 16 hours and analyzed by densitometry with ImageJ  
615 (Schneider et al., 2012; <http://imagej.net>).

616

### 617 **TIRF microscopy**

618 Time-lapse TIRF microscopy movies were obtained using a iXon EMCCD camera (Andor  
619 Technology, Belfast, UK) fitted to an Olympus IX-71 microscope with through-the-  
620 objective TIRF illumination as described (Zimmermann et al., 2016). Mg-ATP-actin (10-  
621 20% Alexa-488 labeled) was mixed with a polymerization mix (10 mM imidazole (pH 7.0),  
622 50 mM KCl, 1 mM MgCl<sub>2</sub>, 1 mM EGTA, 50 mM DTT, 0.2 mM ATP, 50  $\mu$ M CaCl<sub>2</sub>, 15 mM  
623 glucose, 20  $\mu$ g/mL catalase, 100  $\mu$ g/mL glucose oxidase, and 0.5% (400 centipoise)  
624 methylcellulose) to induce F-actin assembly (Winkelman et al., 2014). Where stated,  
625 formin or profilin was added to the polymerization mix prior to mixing with actin and  
626 initiating F-actin polymerization. The mixture was then added to a flow chamber and

627 imaged at 10 s intervals at room temperature. For bead assays, Wsp1 and formin beads  
628 were prepared as previously described (Loisel et al., 1999). Carboxylated Polybeads  
629 (Polysciences, Warrington, PA) were coated with Wsp1 or unlabeled SNAP-  
630 FOR1(3P,FH2) and flowed into the TIRF chamber prior to initiating the reaction.

631

### 632 **Fertilization tubule assay**

633 Wild type 137c (CC-125 mt+) *Chlamydomonas reinhardtii* cells were obtained from the  
634 Chlamydomonas Resource Center (University of Minnesota). To induce gametogenesis,  
635 cells were grown in M-N (M1 minimal media without nitrogen) overnight under growth  
636 lighting. Gametes were mixed with dibutyryl cAMP (13.5mM) and papaverine (135 $\mu$ M) to  
637 induce fertilization tubule formation along with different inhibitor preparations; untreated,  
638 1% DMSO (solvent for all inhibitors), 10 $\mu$ M Latrunculin B, 10 $\mu$ M SMIFH2, 100 $\mu$ M  
639 SMIFH2, and 100 $\mu$ M CK-666. Cells were placed on a rotator under a LumiBar LED light  
640 source (LumiGrow, Inc) for 2hrs. After fertilization tubule induction, cells were adhered to  
641 coverslips coated with poly-lysine and fixed with 4% paraformaldehyde in 10mM HEPES.  
642 They were permeabilized with -20°C acetone, stained with 100nM Alexa Fluor 488  
643 Phalloidin (Life Technologies) according to manufacturer protocols and mounted on slides  
644 with Fluoromount-G (Southern Biotech) for imaging. Slides were imaged with a Nikon Ti-  
645 S widefield fluorescence microscope using a Plan Achromat 100x/1.25 NA oil immersion  
646 objective lens, a QICam fast 1394 CCD digital camera (QImaging) and NIS Elements  
647 software.

648 All cells in multiple fields of view (~50-100 cells per condition) were counted for  
649 presence of fertilization tubules using the ImageJ Cell Counter plugin to determine tubule  
650 percentage ( $\#$ tubules/ $\#$  total cells) x 100. Means and standard deviations are plotted for  
651 experiments done in triplicate. Results were analyzed with one way ANOVA and  
652 Dunnett's multiple comparison post hoc test. For fertilization tubule measurements, line  
653 segments were drawn onto projected FITC images and fit with splines using ImageJ. n>45  
654 measurements were collected following a pixel to micron ratio conversion for the optical  
655 setup and compared using Kruskal-Wallis and Dunn's multiple comparison tests.

656

### 657 **Colony PCR, RNA extraction, reverse transcription (RT)-PCR**

658 Colony PCR was performed as previously described (Cao et al., 2009). The genome-  
659 cassette junctions were amplified via PCR by using different primers set. The primers set  
660 F1/R1 or F2/R2 is used to amplify the left or right insert junction, respectively (F1:  
661 ATCAGGAGCCCCCTGTATTT; R1: GCACCAATCATGTCAAGCCT; F2:  
662 GACGTTACAGCACACCCTTG; R2: CACCTGACGTGTTGTTGACC). Total RNA was  
663 isolated with PureLink™ RNA Mini Kit (Thermo Fisher Scientific). To avoid genomic DNA  
664 contamination, on-column PureLink™ DNase (Thermo Fisher Scientific) treatment was  
665 performed. First-strand cDNA was synthesized from 1 µg purified total RNA with  
666 SuperScript™ III First-Strand Synthesis system (Thermo Fisher Scientific). For RT-PCR,  
667 cDNA fragment coding the majority of the formin FH2 domain was amplified using gene-  
668 specific primers For1\_F and For1\_R (For1\_F: CTCCCCCTCCGGTTATGAG; For1\_R:  
669 CAGACAGCTCGTTCAGCTTG). For both colony PCR and RT-PCR, Phusion® High-  
670 Fidelity DNA Polymerase (New England Biolabs) was used. And the amplification  
671 conditions were as follows: 98°C for 30 sec, followed by 35 cycles of 98°C for 10 sec,  
672 65°C for 10 sec and 72°C for 60 sec.

673

674

675

676 **Figures**

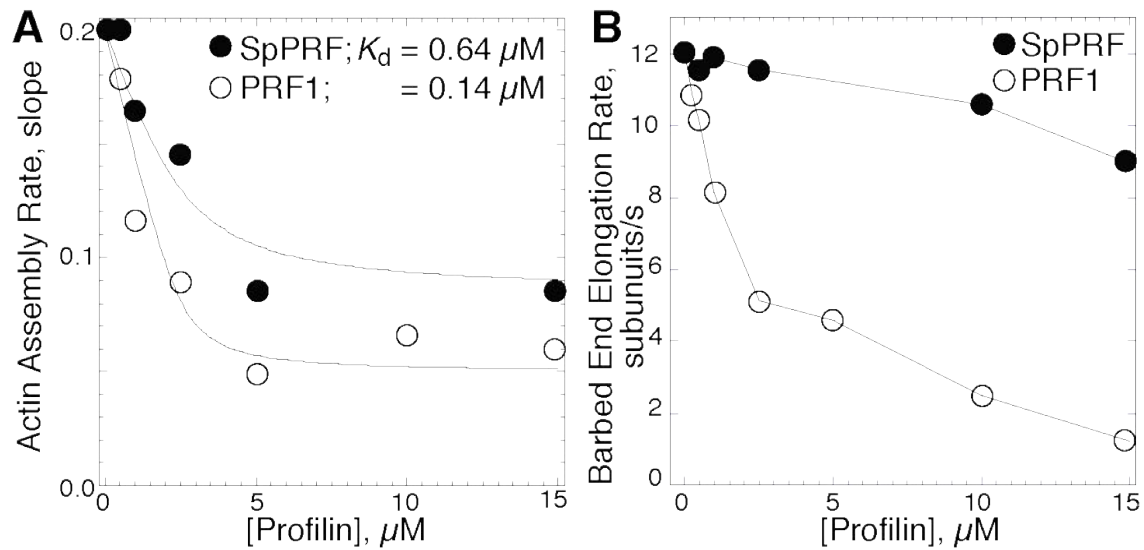

677

678 **Figure 1: PRF1 inhibits nucleation and elongation of actin filaments.**

679 (A) Slopes of spontaneous pyrene actin assembly assays ( $1.5 \mu\text{M}$  Mg-ATP actin, 20%  
680 pyrene labeled) with increasing concentrations of fission yeast profilin SpPRF or  
681 *Chlamydomonas reinhardtii* profilin PRF1. Curve fits reveal affinities of SpPRF and PRF1  
682 for actin monomer. (B) Barbed end elongation rates of  $1.5 \mu\text{M}$  Mg-ATP actin (10% Alexa-  
683 488 labeled) in the presence of increasing concentrations of SpPRF or PRF1, measured  
684 by TIRF microscopy.

685

686

687

688

689

690

691

692

693

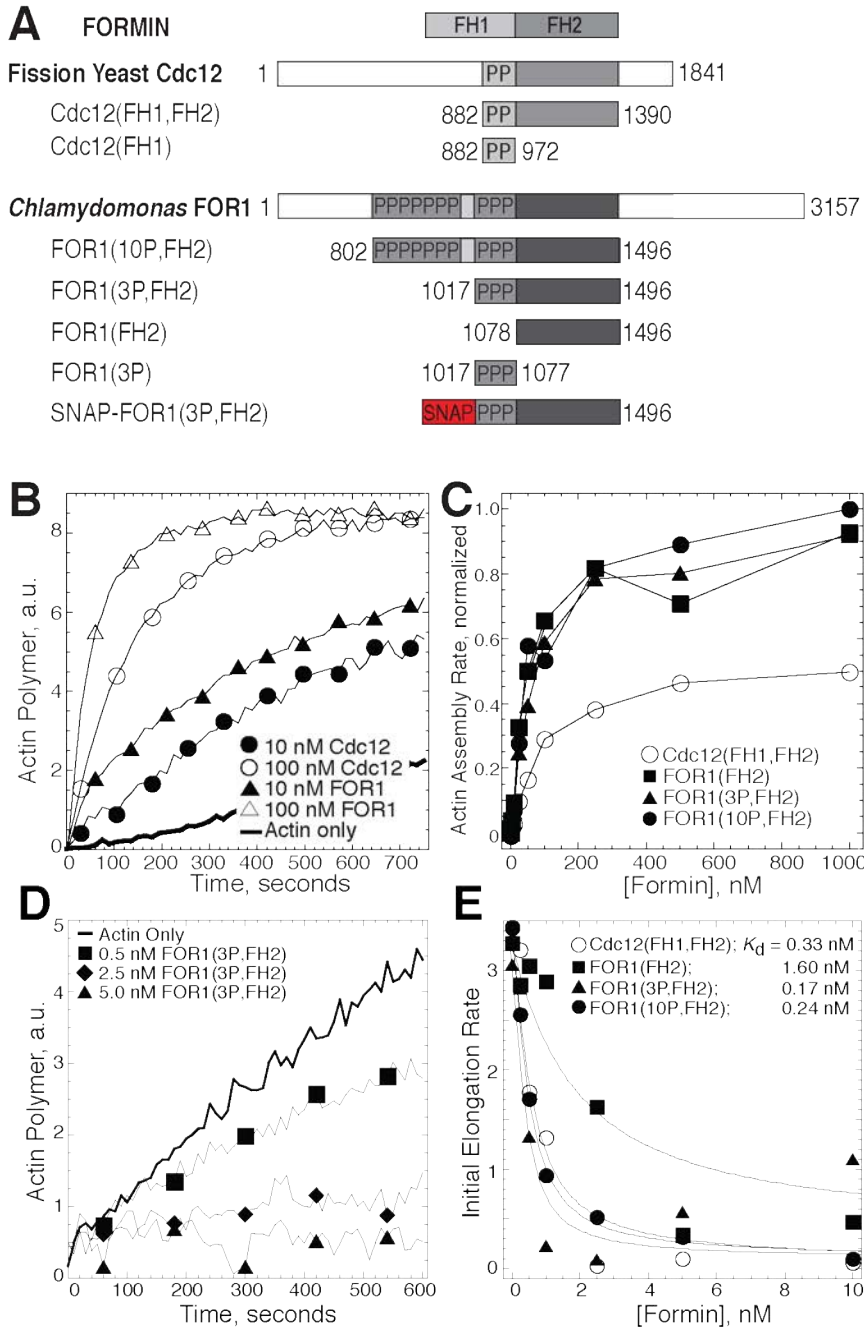

694

695

696 **Figure 2: FOR1 efficiently nucleates actin filaments that elongate slowly.**

697 (A) Domain organizations and constructs used in this study of fission yeast formin Cdc12  
 698 and *Chlamydomonas reinhardtii* formin FOR1. Numbers denote amino acid residues.

699 Each “P” indicates a putative profilin binding site of at least 6 prolines within 8 residues.

700 (B and C) Spontaneous assembly of 2.5  $\mu$ M Mg-ATP actin monomers (20% pyrene

701 labeled). (B) Pyrene fluorescence over time for actin alone (thick curve), and with 10 (●)



702 or 100 nM ( $\circ$ ) Cdc12(FH1,FH2) or 10 ( $\blacktriangle$ ) and 100 nM ( $\triangle$ ) FOR1(3P,FH2). (C)  
703 Dependence of the normalized actin assembly rate (slope) on the concentration of  
704 Cdc12(FH1,FH2) ( $\circ$ ), FOR1(FH2) ( $\blacksquare$ ), FOR1(3P,FH2) ( $\blacktriangle$ ), and FOR1(10P,FH2) ( $\bullet$ ). (D  
705 and E) Seeded assembly of 0.2  $\mu$ M Mg-ATP actin monomers (20% pyrene labeled) onto  
706 0.5  $\mu$ M preassembled filaments. (D) Pyrene fluorescence over time for actin alone (thick  
707 line) or in the presence of 0.5 ( $\blacksquare$ ), 1.0 ( $\blacklozenge$ ), or 2.5 nM ( $\blacktriangle$ ) FOR1(3P,FH2). (E) Dependence  
708 of the initial barbed end assembly rate on formin concentration. Curve fits revealed  
709 equilibrium dissociation constants of 0.33 nM for Cdc12(FH1,FH2) ( $\circ$ ), 1.6 nM for  
710 FOR1(FH2) ( $\blacksquare$ ), 0.17 nM for FOR1(3P,FH2) ( $\blacktriangle$ ), and 0.24 nM for FOR1(10P,FH2) ( $\bullet$ ).

711

712

713

714

715

716

717

718

719

720

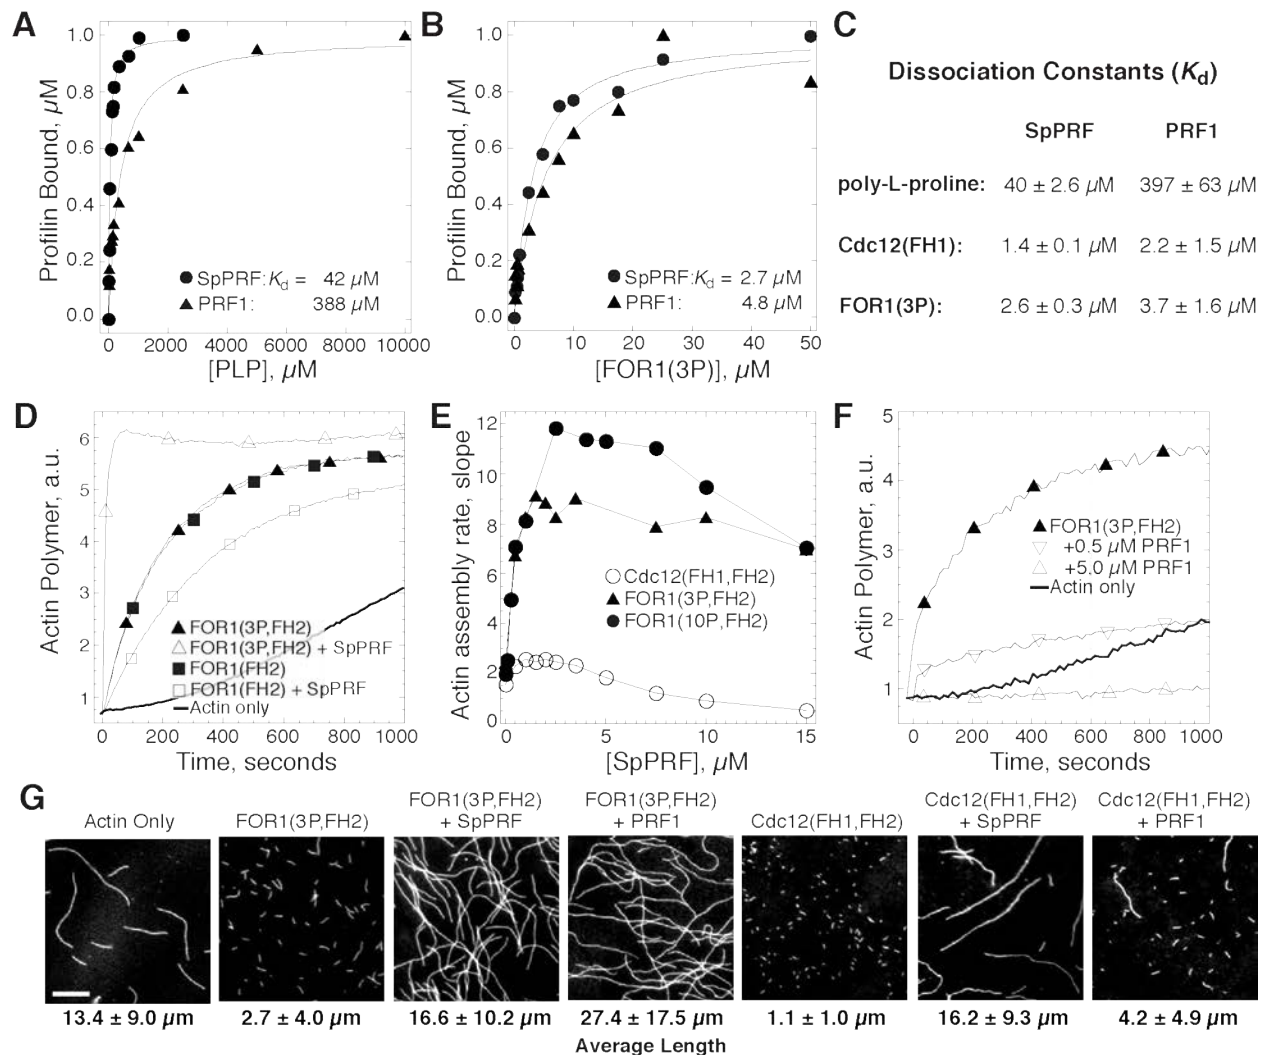

721

722 **Figure 3: FOR1 stimulates the assembly of profilin-actin.** (A-C) Affinity of profilin for

723 poly-L-proline and formin FH1 domains. Dependence of fission yeast SpPRF (●) and

724 PRF1 (▲) intrinsic tryptophan fluorescence on the concentration of poly-L-proline (A) and

725 FOR1(3P) (B). (C) Average affinity of SpPRF and PRF1 for poly-L-proline, Cdc12(FH1)

726 and FOR1(3P);  $n \geq 3$  experiments. (D-F) Spontaneous assembly of 2.5  $\mu\text{M}$  Mg-ATP actin

727 (20% pyrene-labeled). (D) Pyrene fluorescence over time for actin alone (thick curve),

728 and with 10 nM FOR1(FH2) in the absence (■) or presence (□) of 2.5  $\mu\text{M}$  SpPRF, and

729 with 10 nM FOR1(3P,FH2) in the absence (▲) or presence (△) of 2.5  $\mu\text{M}$  SpPRF. (E)

730 Dependence of the actin assembly rate (slope) on the concentration of SpPRF for  
731 reactions containing 10 nM Cdc12(FH1,FH2) ( $\circ$ ), 10 nM FOR1(3P,FH2) ( $\blacktriangle$ ) or 10 nM  
732 FOR1(10P,FH2) ( $\bullet$ ). (F) Pyrene fluorescence over time for actin alone (thick curve), and  
733 with 10 nM FOR1(3P,FH2) in the absence ( $\blacktriangle$ ), or presence of 0.5  $\mu$ M ( $\nabla$ ), or 5.0  $\mu$ M ( $\Delta$ )  
734 PRF1. (G) Fluorescence micrographs of actin filaments taken 10 minutes after the  
735 initiation of the indicated reactions with 10 nM formin and 2.5  $\mu$ M profilin. Samples were  
736 labeled with rhodamine-phalloidin and adsorbed to glass coverslips coated with poly-L-  
737 lysine. Scale bar, 5  $\mu$ m.  
738

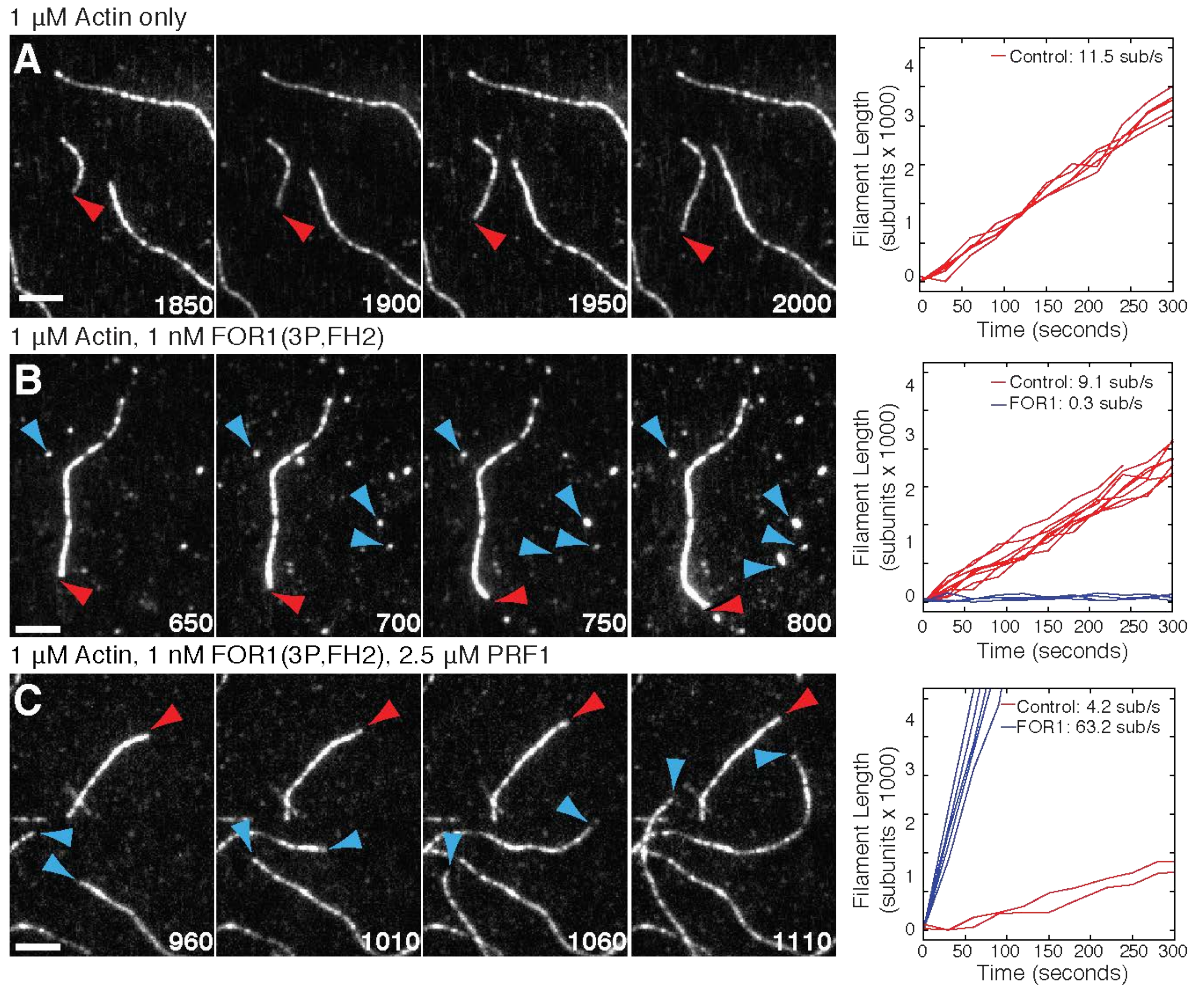

739

740 **Figure 4: FOR1 rapidly elongates actin filaments in the presence of PRF1.**

741 **(A-C)** TIRF microscopy of 1  $\mu$ M Mg-ATP actin (20% Alexa-488 labeled). (Left) Time lapse  
742 micrographs with time in seconds of actin alone **(A)**, with 1 nM FOR1(3P,FH2) **(B)**, or with  
743 1 nM FOR1(3P,FH2) and 2.5  $\mu$ M PRF1. Red and blue arrowheads denote control (formin  
744 independent) and FOR1-dependent filaments, respectively. Scale bars, 5  $\mu$ m. (Right)  
745 Rates of filament growth for control (red lines) and FOR1-associated (blue lines)  
746 filaments.

747

748

749

750

751

752

753

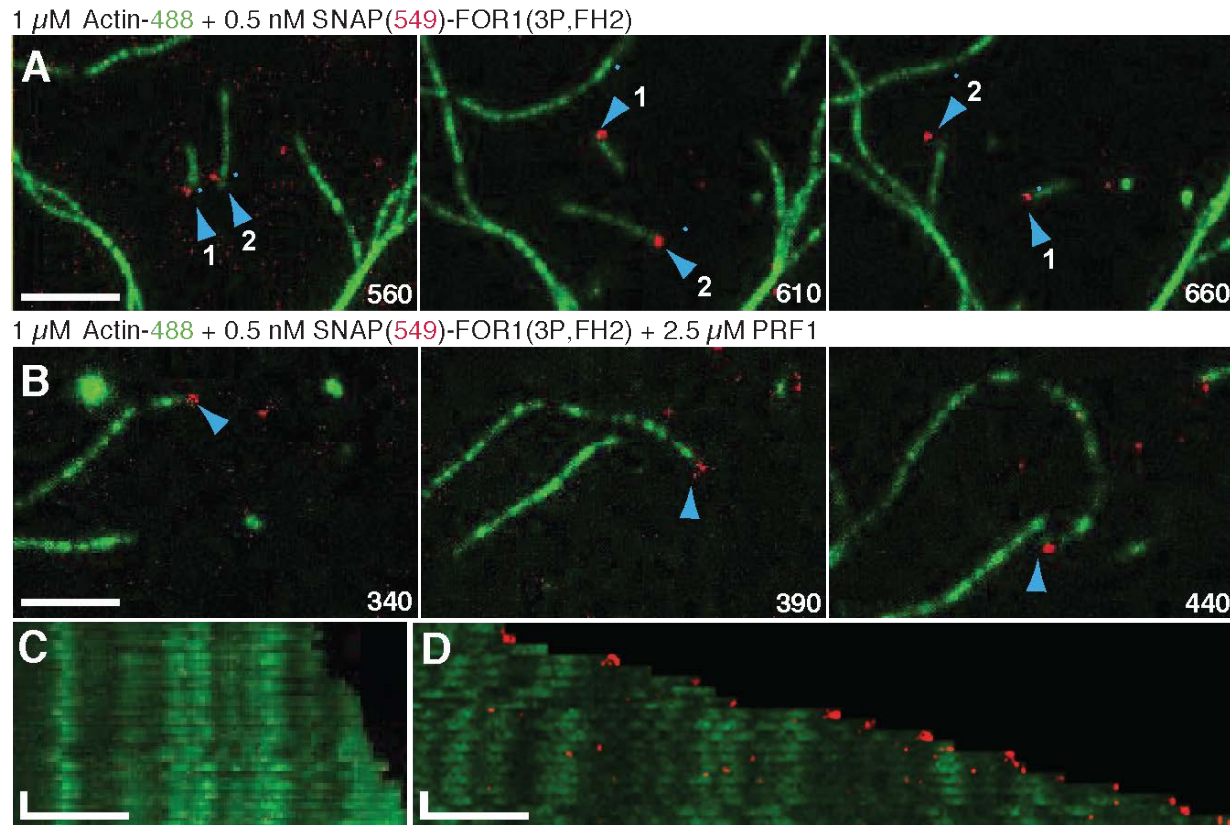

754

755 **Figure 5: FOR1 is processive on F-actin barbed ends in the absence and presence**  
756 **of PRF1.**

757 **(A-D)** Two-color TIRF microscopy of 1  $\mu$ M Mg-ATP actin (10% Alexa-488 labeled) with  
758 0.5  $\mu$ M SNAP-FOR1(3P,FH2) (549-labeled) in the presence or absence of 2.5  $\mu$ M PRF1.  
759 Blue arrowheads denote formin-bound filaments. **(A)** 0.5  $\mu$ M SNAP-FOR1(3P,FH2)  
760 alone. **(B)** 0.5  $\mu$ M SNAP-FOR1(3P,FH2) in the presence of 2.5  $\mu$ M PRF1. **(C and D)**  
761 Kymographs of control **(C)** and formin-bound **(D)** filaments from **(B)**. Scale bars, x-axis, 5  
762  $\mu$ m. Time bars, y-axis, 30 sec.

763

764

765

766

767

768

769

770

771

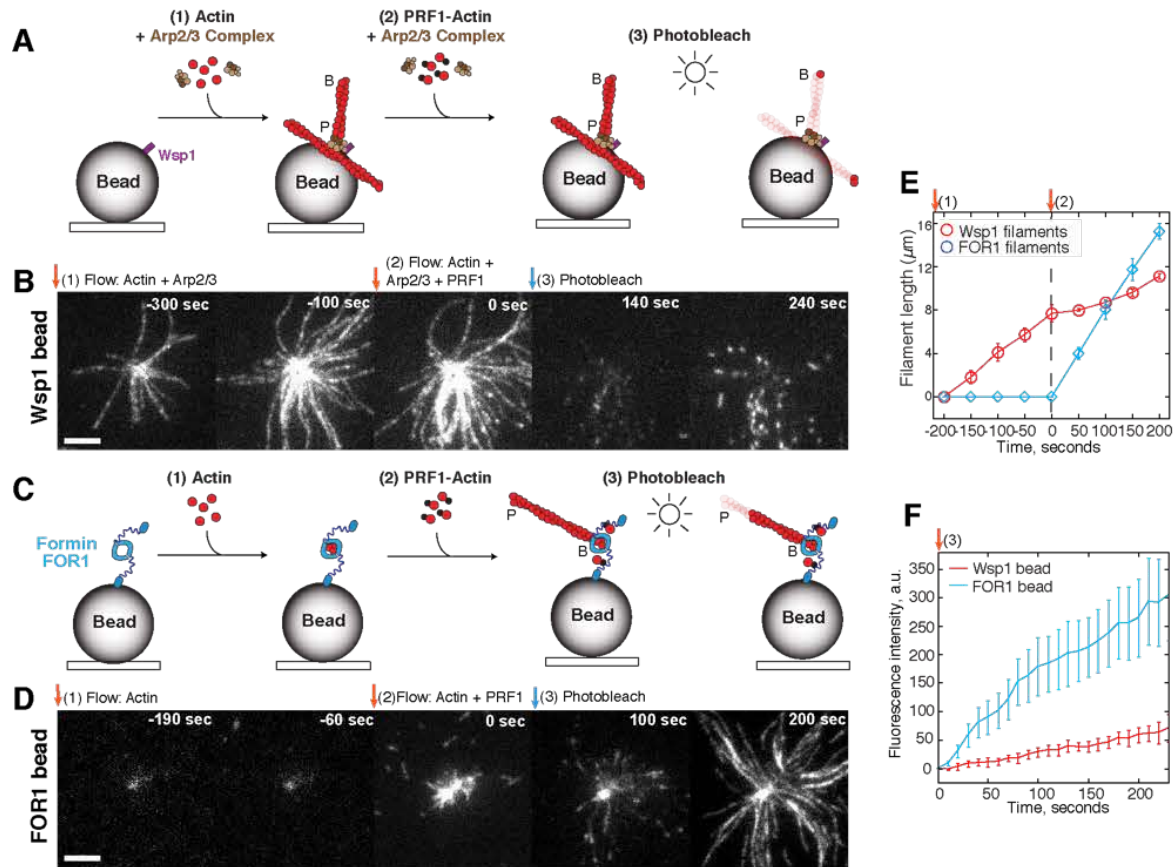

772

773 **Figure 6: PRF1 facilitates formin- over Arp2/3 complex-mediated assembly.**

774 **(A-F)** TIRF microscopy bead assays. Fission yeast Arp2/3 complex activator Wsp1 or  
 775 formin SNAP-FOR1(3P,FH2) (unlabeled) are adsorbed to a polystyrene bead and the  
 776 effect of PRF1-actin on network formation is observed. 'B' and 'P' indicate actin filament  
 777 barbed and pointed ends, respectively. Scale bars, 5 μm. **(A-B)** Reactions containing  
 778 beads coated with Wsp1. 1.5 μM Mg-ATP actin (10% Alexa-488 labeled) and 30 nM  
 779 Arp2/3 complex is initially flowed into the chamber (1), followed by actin, Arp2/3 complex,  
 780 and 2.5 μM PRF1 (2). Filaments are then photobleached to observe new F-actin  
 781 assembly (3). **(C-D)** Reactions containing beads coated with FOR1. Actin is initially flowed  
 782 into the chamber (1), followed by actin and PRF1 (2), and then photobleached (3). **(E)**  
 783 Actin filament length over time for filaments associated with Wsp1 (red) or FOR1 (blue)

784 beads. The timepoints of initial flow of actin (1) and actin with PRF1 (2) are indicated.  
785 Value reported is mean  $\pm$  s.e.m., n=5 filaments. **(F)** Quantification of fluorescence  
786 intensity (actin assembly) at the surface of Wsp1-coated (red) or FOR1-coated (blue)  
787 beads following flow-in of PRF1-actin and photobleaching. Each experiment was  
788 replicated twice. Value reported is mean  $\pm$  s.e.m., n=3 Wsp1 or n=4 FOR1 beads.

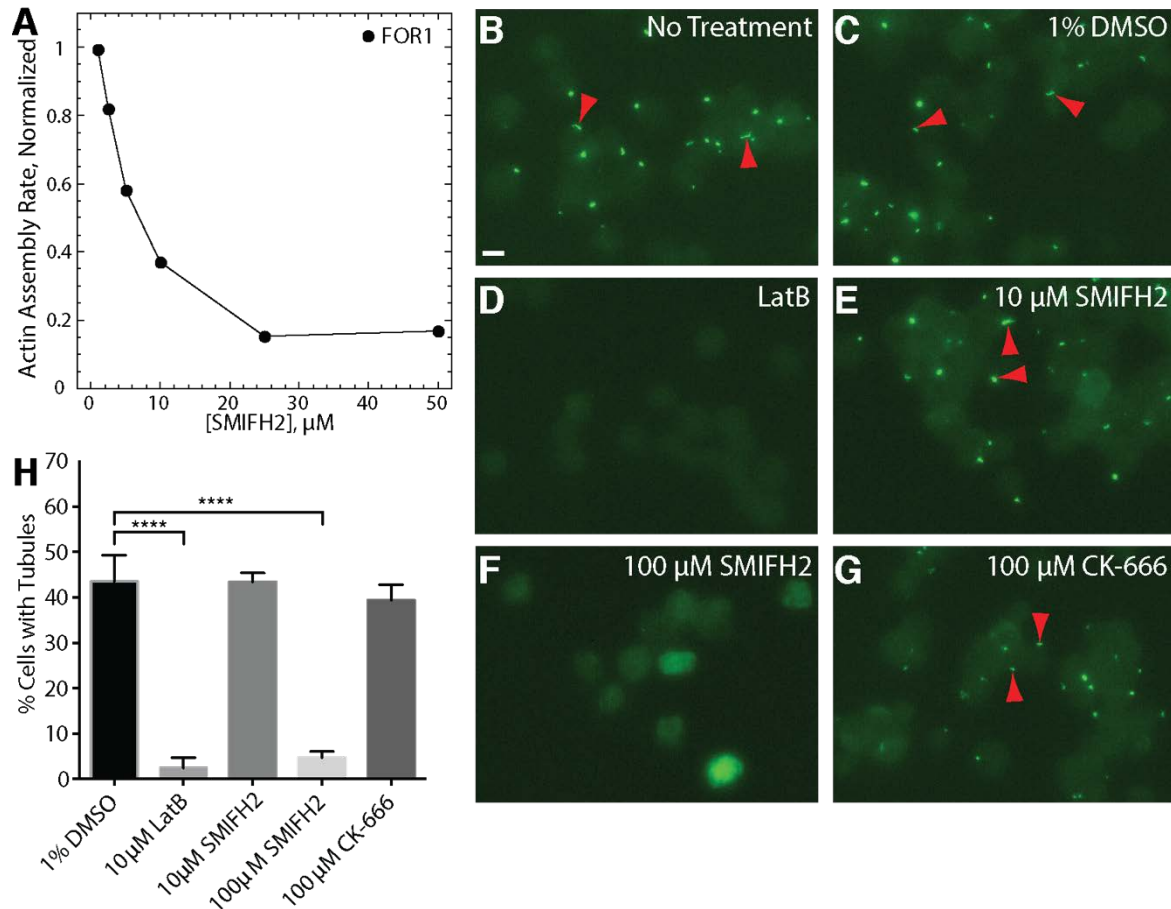

789

790

791 **Figure 7: SMIFH2 formin inhibition disrupts fertilization tubules in *Chlamydomonas***  
 792 **gametes.**

793 **(A)** Normalized actin assembly rate of FOR1(3P,FH2) (●) in the presence of increasing  
 794 concentrations of formin inhibitor SMIFH2. **(B-F)** Representative fluorescent micrographs  
 795 of *Chlamydomonas* gamete fertilization tubules (red arrowheads) labeled with the F-actin  
 796 marker 488-phalloidin. Scale bar, 10  $\mu\text{m}$ . **(B)** Untreated control. **(C)** 1% DMSO control.  
 797 **(D)** 10  $\mu\text{M}$  actin depolymerization drug Latrunculin B. **(E)** 10  $\mu\text{M}$  formin inhibitor SMIFH2.  
 798 **(F)** 100  $\mu\text{M}$  SMIFH2. **(G)** 100  $\mu\text{M}$  Arp2/3 complex inhibitor CK-666. **(H)** Quantification of  
 799 the percent of cells with fertilization tubules following indicated treatments. n=3  
 800 independent experiments. Values reported are mean  $\pm$  s.d., \*\*\*\*p<0.0001.

801



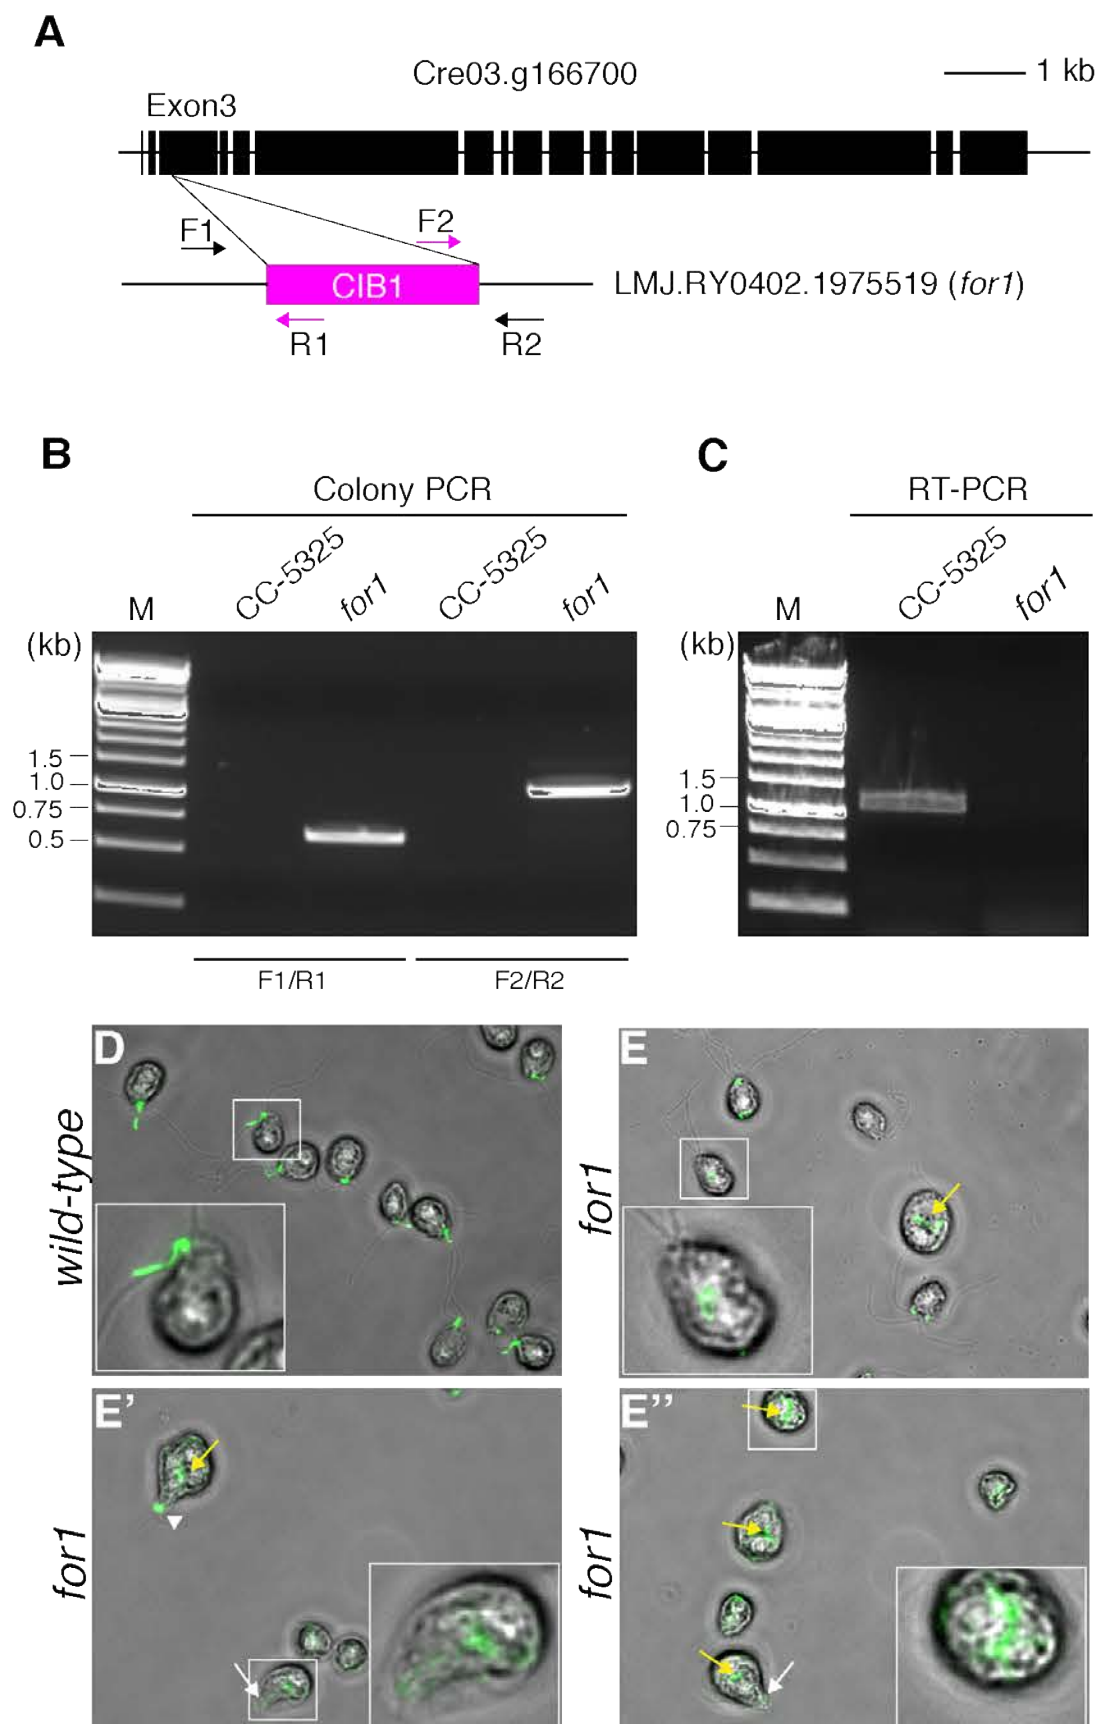

803 **Figure 8: Insertional mutant of *FOR1* fails to make fertilization tubules. (A).** Diagram  
804 of *Chlamydomonas FOR1* gene. Exons are shown as black rectangles. The CIB1  
805 cassette is inserted in the exon3 of Cre03.g166700 in the *for1* mutant. Arrows indicates  
806 primer locations for detecting the cassette insertion. **(B).** Examination of the genome-  
807 cassette junctions by PCR from genomic DNA in the wild type parent strain (CC-5325) or  
808 the formin mutant (*for1*). **(C).** RT-PCR of the functional domain, FH2, of formin in wild type  
809 (CC-5325) and the formin mutant (*for1*). **(D-E’’).** Phalloidin-Alexa Fluor 488 labeled  
810 fertilization tubules in wild-type (D) and *for1* mutant (**E, E’, E’’**) cells. *for1* mutants retain  
811 mid-cell actin labeling (yellow arrows) and have apical protrusions where tubules should  
812 form (white arrows). A collection of labeled actin could sometimes be seen at the tip of  
813 the protrusion (white arrowhead).

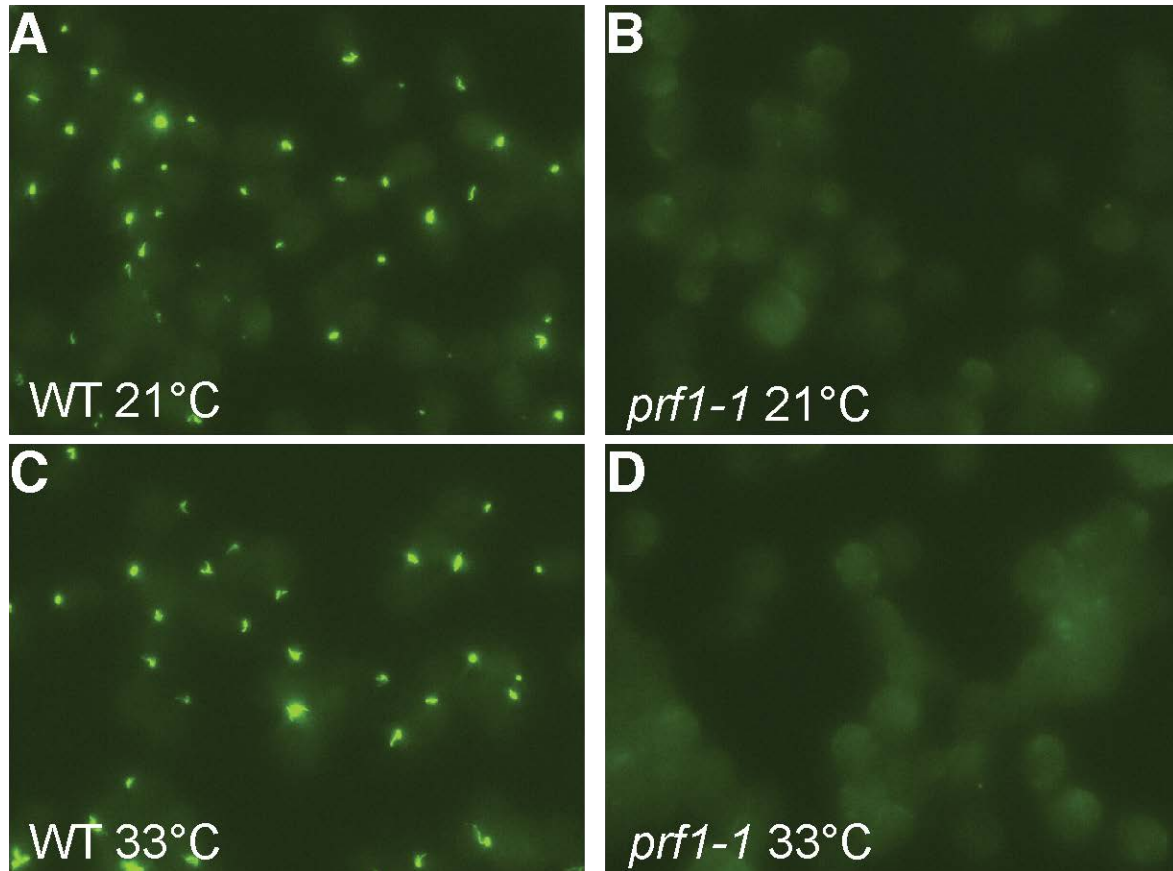

814

815

**Figure 9: Profilin mutants fail to make fertilization tubules.**

816

**(A-D)** Wild-type and profilin mutant (*prf1-1*) cells stained with phalloidin-Alexa Fluor 488

817

to label filamentous actin-rich fertilization tubules. **(A)** Wild-type cells at the permissive

818

temperature, 21°C. **(B)** Temperature sensitive *prf1-1* mutants at the permissive

819

temperature, 21°C. **(C)** Wild-type cells at the restrictive temperature, 33°C. **(D)**

820

Temperature sensitive *prf1-1* mutants at the restrictive temperature, 33°C.

821

822

884 **REFERENCES**

885

886 **Avasthi, P., Onishi, M., Karpiak, J., Yamamoto, R., Mackinder, L., Jonikas, M. C.,**  
887 **Sale, W. S., Shoichet, B., Pringle, J. R. and Marshall, W. F.** (2014). Actin is required  
888 for IFT regulation in *Chlamydomonas reinhardtii*. *Curr. Biol.* **24**, 2025–2032.

889 **Bestul, A. J., Christensen, J. R., Grzegorzewska, A. P., Burke, T. A., Sees, J. A.,**  
890 **Carroll, R. T., Sirotkin, V., Keenan, R. J. and Kovar, D. R.** (2015). Fission yeast  
891 profilin is tailored to facilitate actin assembly by the cytokinesis formin Cdc12. *Mol.*  
892 *Biol. Cell* **26**, 283–293.

893 **Breitsprecher, D. and Goode, B. L.** (2013). Formins at a glance. *J. Cell. Sci.* **126**, 1–7.

894 **Cao, M., Fu, Y., Guo, Y. and Pan, J.** (2009). *Chlamydomonas* (Chlorophyceae) colony  
895 PCR. *Protoplasma* **235**, 107–110.

896 **Carlsson, L., Nystrom, L. E., Sundkvist, I., Markey, F. and Lindberg, U.** (1977). Actin  
897 polymerizability is influenced by profilin, a low molecular weight protein in non-muscle  
898 cells. *J. Mol. Biol.* **115**, 465–483.

899 **Courtemanche, N., and Pollard, T.D.** (2013). Interaction of profilin with the barbed end  
900 of actin filaments. *Biochemistry* **52**, 6456-6466.

901 **Craig EW, Mueller DM, Schaffer M, Engel BD, Avasthi P.** (2019). The elusive actin  
902 cytoskeleton of a green alga expressing both conventional and divergent  
903 actins. *bioRxiv*. doi.org/10.1101/554279 (preprint posted February 18, 2019)

904 **Craig, E. W. and Avasthi, P.** (2019). Visualizing filamentous actin in *Chlamydomonas*  
905 *reinhardtii*. *Bio-protocol* **9**, e3274.

906 **Detmers, P. A., Carboni, J. M. and Condeelis, J.** (1985). Localization of actin in  
907 *Chlamydomonas* using antiactin and NBD-phalloidin. *Cell Motil.* **5**, 415–430.

908 **Detmers, P. A., Goodenough, U. W. and Condeelis, J.** (1983). Elongation of the  
909 fertilization tubule in *Chlamydomonas*: new observations on the core microfilaments  
910 and the effect of transient intracellular signals on their structural integrity. *J. Cell Biol.*  
911 **97**, 522–532.

912 **Goldschmidt-Clermont, P. J., Kim, J. W., Machesky, L. M., Rhee, S. G. and Pollard,**  
913 **T. D.** (1991). Regulation of phospholipase C-gamma 1 by profilin and tyrosine  
914 phosphorylation. *Science* **251**, 1231–1233.

915 **Goodenough, U. W. and Weiss, R. L.** (1975). Gametic differentiation in  
916 *Chlamydomonas reinhardtii*. III. Cell wall lysis and microfilament-associated mating  
917 structure activation in wild-type and mutant strains. *J. Cell Biol.* **67**, 623–637.

918 **Gould, C.J., Maiti, S., Michelot, A., Graziano, B.R., Blanchoin, L., and Goode, B.L.**  
919 (2011). The formin DAD domain plays dual roles in autoinhibition and actin nucleation.

- 920 *Curr. Biol.* **21**, 384-390.
- 921 **Hirono, M., Uryu, S., Ohara, A., Kato-Minoura, T., and Kamiya, R.** (2003). Expression  
922 of conventional and unconventional actins in *Chlamydomonas reinhardtii* upon  
923 deflagellation and sexual adhesion. *Eukaryot. Cell* **2**, 486–493.
- 924 **Jack, B., Mueller, D.M., Fee, A.C., Tetlow, A.L., and Avasthi, P.** (2019). Partially  
925 redundant actin genes in *Chlamydomonas* control transition zone organization and  
926 flagellum-directed traffic. *Cell Rep.* **27**, 2459-2467.
- 927 **Kaiser, D. A., Vinson, V. K., Murphy, D. B. and Pollard, T. D.** (1999). Profilin is  
928 predominantly associated with monomeric actin in *Acanthamoeba*. *J. Cell. Sci.* **112**,  
929 3779–3790.
- 930 **Kato-Minoura, T., Uryu, S., Hirono, M., and Kamiya, R.** (1998). Highly divergent actin  
931 expressed in a *Chlamydomonas* mutant lacking the conventional actin gene.  
932 *Biochem. Biophys. Res. Commun.* **251**, 71-76.
- 933 **Kato-Minoura, T., Hirono, M. and Kamiya, R.** (1997). *Chlamydomonas* inner-arm  
934 dynein mutant, *ida5*, has a mutation in an actin-encoding gene. *J. Cell. Biol.* **137**, 649–  
935 656.
- 936 **Kollmar, M., Lbik, D. and Enge, S.** (2012). Evolution of the eukaryotic ARP2/3 activators  
937 of the WASP family: WASP, WAVE, WASH, and WHAMM, and the proposed new  
938 family members WAWH and WAML. *BMC Res. Notes* **5**, 88.
- 939 **Kovar, D. R.** (2006). Molecular details of formin-mediated actin assembly. *Curr. Opin.*  
940 *Cell Biol.* **18**, 11–17.
- 941 **Kovar, D. R. and Pollard, T. D.** (2004). Insertional assembly of actin filament barbed  
942 ends in association with formins produces piconewton forces. *Proc. Natl. Acad. Sci.*  
943 *USA* **101**, 14725–14730.
- 944 **Kovar, D. R., Harris, E. S., Mahaffy, R., Higgs, H. N. and Pollard, T. D.** (2006). Control  
945 of the assembly of ATP- and ADP-actin by formins and profilin. *Cell* **124**, 423–435.
- 946 **Kovar, D. R., Kuhn, J. R., Tichy, A. L. and Pollard, T. D.** (2003). The fission yeast  
947 cytokinesis formin Cdc12p is a barbed end actin filament capping protein gated by  
948 profilin. *J. Cell. Biol.* **161**, 875–887.
- 949 **Kovar, D. R., Yang, P., Sale, W. S., Drobak, B. K. and Staiger, C. J.** (2001).  
950 *Chlamydomonas reinhardtii* produces a profilin with unusual biochemical properties.  
951 *J. Cell. Sci.* **114**, 4293–4305.
- 952 **Lee, V. D., Finstad, S. L. and Huang, B.** (1997). Cloning and characterization of a gene  
953 encoding an actin-related protein in *Chlamydomonas*. *Gene* **197**, 153–159.
- 954 **Loisel, T. P., Boujemaa, R., Pantaloni, D. and Carlier, M. F.** (1999). Reconstitution of

- 955 actin-based motility of *Listeria* and *Shigella* using pure proteins. *Nature* **401**, 613–616.
- 956 **Lu, J. and Pollard, T. D.** (2001). Profilin binding to poly-L-proline and actin monomers  
957 along with ability to catalyze actin nucleotide exchange is required for viability of  
958 fission yeast. *Mol. Biol. Cell* **12**, 1161–1175.
- 959 **Mockrin, S. C. and Korn, E. D.** (1980). *Acanthamoeba* profilin interacts with G-actin to  
960 increase the rate of exchange of actin-bound adenosine 5'-triphosphate. *Biochemistry*  
961 **19**, 5359–5362.
- 962 **Neidt, E. M., Scott, B. J. and Kovar, D. R.** (2009). Formin differentially utilizes profilin  
963 isoforms to rapidly assemble actin filaments. *J. Biol. Chem.* **284**, 673–684.
- 964 **Nolen, B. J., Tomasevic, N., Russell, A., Pierce, D. W., Jia, Z., McCormick, C. D.,**  
965 **Hartman, J., Sakowicz, R. and Pollard, T. D.** (2009). Characterization of two classes  
966 of small molecule inhibitors of Arp2/3 complex. *Nature* **460**, 1031–1035.
- 967 **Onishi, M., Pringle, J. R. and Cross, F. R.** (2016). Evidence that an unconventional  
968 actin can provide essential F-actin function and that a surveillance system monitors  
969 F-actin integrity in *Chlamydomonas*. *Genetics* **202**, 977–996.
- 970 **Onishi, M., Pecani, K., Jones, T., Pringle, J.R., and Cross, F.R.** (2018). F-actin  
971 homeostasis through transcriptional regulation and proteasome-mediated proteolysis.  
972 *Proc. Natl. Acad. Sci. USA* **115**, E6487-E6496.
- 973 **Otomo, T., Tomchick, D. R., Otomo, C., Panchal, S. C., Machius, M. and Rosen, M.**  
974 **K.** (2005). Structural basis of actin filament nucleation and processive capping by a  
975 formin homology 2 domain. *Nature* **433**, 488–494.
- 976 **Perelroizen, I., Didry, D., Christensen, H., Chua, N. H. and Carlier, M. F.** (1996). Role  
977 of nucleotide exchange and hydrolysis in the function of profilin in action assembly. *J.*  
978 *Biol. Chem.* **271**, 12302–12309.
- 979 **Perelroizen, I., Marchand, J. B., Blanchoin, L., Didry, D. and Carlier, M. F.** (1994).  
980 Interaction of profilin with G-actin and poly(L-proline). *Biochemistry* **33**, 8472–8478.
- 981 **Pernier, J., Shekhar, S., Jegou, A., Guichard, B. and Carlier, M.-F.** (2016). Profilin  
982 interaction with actin filament barbed end controls dynamic instability, capping,  
983 branching, and motility. *Dev. Cell* **36**, 201–214.
- 984 **Petrella, E. C., Machesky, L. M., Kaiser, D. A. and Pollard, T. D.** (1996). Structural  
985 requirements and thermodynamics of the interaction of proline peptides with profilin.  
986 *Biochemistry* **35**, 16535–16543.
- 987 **Pollard, T. D. and Cooper, J. A.** (1984). Quantitative analysis of the effect of  
988 *Acanthamoeba* profilin on actin filament nucleation and elongation. *Biochemistry* **23**,  
989 6631–6641.

- 990 **Rizvi, S. A., Neidt, E. M., Cui, J., Feiger, Z., Skau, C. T., Gardel, M. L., Kozmin, S. A.**  
991 **and Kovar, D. R.** (2009). Identification and characterization of a small molecule  
992 inhibitor of formin-mediated actin assembly. *Chem. Biol.* **16**, 1158–1168.
- 993 **Rotty, J. D., Wu, C., Haynes, E. M., Suarez, C., Winkelman, J. D., Johnson, H. E.,**  
994 **Haugh, J. M., Kovar, D. R. and Bear, J. E.** (2015). Profilin-1 serves as a gatekeeper  
995 for actin assembly by Arp2/3-dependent and -independent pathways. *Dev. Cell* **32**,  
996 54–67.
- 997 **Schneider, C. A., Rasband, W.S., and Eliceiri, K. W.** (2012). NIH Image to ImageJ: 25  
998 years of image analysis. *Nat. Methods* **9**, 671-675.
- 999 **Schutt, C.E., Myslik, J.C., Rozycki, M.D., Goonesekere, N.C., and Lindberg, U.**  
1000 (1993). The structure of crystalline profilin-beta-actin. *Nature* **365**, 810-816.
- 1001 **Scott, B. J., Neidt, E. M. and Kovar, D. R.** (2011). The functionally distinct fission yeast  
1002 formins have specific actin-assembly properties. *Mol. Biol. Cell* **22**, 3826–3839.
- 1003 **Spudich, J. A. and Watt, S.** (1971). The regulation of rabbit skeletal muscle contraction.  
1004 I. Biochemical studies of the interaction of the tropomyosin-troponin complex with  
1005 actin and the proteolytic fragments of myosin. *J. Biol. Chem.* **246**, 4866–4871.
- 1006 **Suarez, C. and Kovar, D. R.** (2016). Internetwork competition for monomers governs  
1007 actin cytoskeleton organization. *Nat. Rev. Mol. Cell Biol.* **17**, 799-810.
- 1008 **Suarez, C., Carroll, R. T., Burke, T. A., Christensen, J. R., Bestul, A. J., Sees, J. A.,**  
1009 **James, M. L., Sirotkin, V. and Kovar, D. R.** (2015). Profilin regulates F-actin network  
1010 homeostasis by favoring formin over Arp2/3 complex. *Dev. Cell* **32**, 43–53.
- 1011 **Tulin, F., and Cross, F.R.** (2014). A microbial avenue to cell cycle control in the plant  
1012 superkingdom. *Plant Cell* **26**, 4019-4038.
- 1013 **Wilson, N. F., Foglesong, M. J. and Snell, W. J.** (1997). The *Chlamydomonas* mating  
1014 type plus fertilization tubule, a prototypic cell fusion organelle: isolation,  
1015 characterization, and in vitro adhesion to mating type minus gametes. *J. Cell Biol.*  
1016 **137**, 1537–1553.
- 1017 **Winkelman, J. D., Bilancia, C. G., Peifer, M. and Kovar, D. R.** (2014). Ena/VASP  
1018 Enabled is a highly processive actin polymerase tailored to self-assemble parallel-  
1019 bundled F-actin networks with Fascin. *Proc. Natl. Acad. Sci. USA* **111**, 4121-4126.
- 1020 **Zimmermann, D., Morganthaler, A. N., Kovar, D. R. and Suarez, C.** (2016). In vitro  
1021 biochemical characterization of cytokinesis actin-binding proteins. *Methods Mol. Biol.*  
1022 **1369**, 151–179.
- 1023
