# Supplementary material for: Chlamydomonas reinhardtii formin FOR1 and profilin PRF1 are optimized for acute rapid actin filament assembly
Source: bioRxiv or medRxiv preprint supplement (doi:10.1101/096008), 2019-07-20
Supplement: Supplementary file [file 096008-1.pdf]

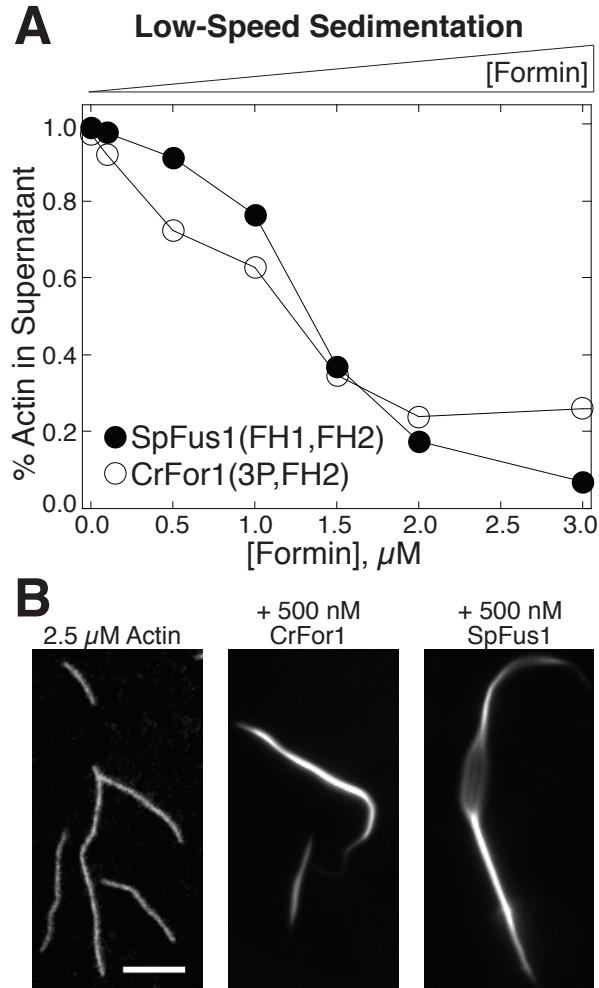

**Supplementary Figure S1: CrFor1 bundles F-actin.**

(A) Low speed (10,000  $\times g$ ) sedimentation of F-actin preassembled from 5  $\mu\text{M}$  Mg-ATP actin with a range of concentrations of CrFor1 ( $\circ$ ) or fission yeast formin SpFus1 ( $\bullet$ ). Plot of the dependence of F-actin in the pellets on the concentration of CrFor1 or SpFus1. (B) Fluorescence micrographs of F-actin preassembled alone or in the presence of CrFor1 or SpFus1 for 20 min and stained with rhodamine-phalloidin. Scale bar, 5  $\mu\text{m}$ .
