# Supplementary material for: Chlamydomonas reinhardtii formin FOR1 and profilin PRF1 are optimized for acute rapid actin filament assembly
Source: bioRxiv or medRxiv preprint supplement (doi:10.1101/096008), 2019-07-20
Supplement: Supplementary file [file 096008-1.pdf]

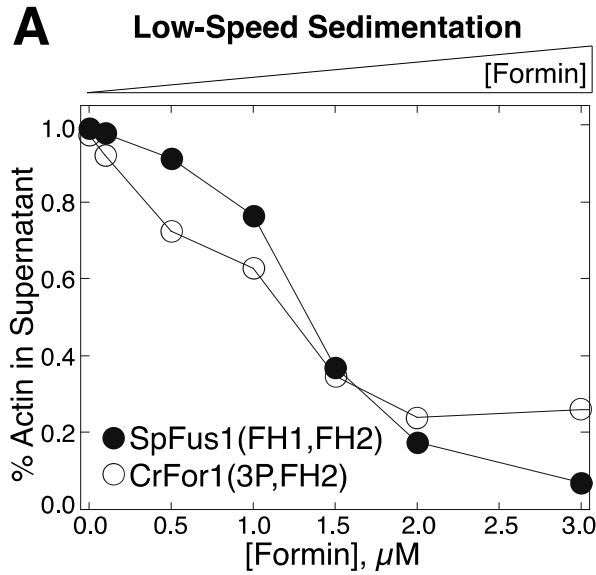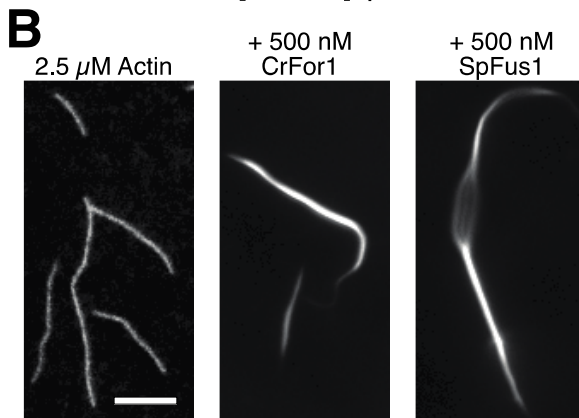

735

736 **Supplementary Figure S1: CrFor1 bundles F-actin.**

737 **(A)** Low speed (10,000 x g) sedimentation of F-actin preassembled from 5  $\mu\text{M}$  Mg-ATP  
 738 actin with a range of concentrations of CrFor1 ( $\circ$ ) or fission yeast formin SpFus1 ( $\bullet$ ).

739 Plot of the dependence of F-actin in the pellets on the concentration of CrFor1 or  
 740 SpFus1. (B) Fluorescence micrographs of F-actin preassembled alone or in the  
 741 presence of CrFor1 or SpFus1 for 20 min and stained with rhodamine-phalloidin. Scale  
 742 bar, 5  $\mu\text{m}$ .

743

744 **Supplemental Movie Figure Legends:**

745

746 **Movie 1: CrPRF facilitates formin- over Arp2/3 complex-mediated actin assembly,**

747 **related to Figure 6.** TIRF microscopy bead assays. Beads coated with fission yeast

748 Wsp1 (left panel) or CrFor1 (right panel) were incubated with a series of components

749 (listed in top left of each movie). (Left panel) Wsp1 bead is incubated with 1.5  $\mu$ M actin

750 (10% Alexa-488 labeled) and 30 nM Arp2/3 complex (Actin, Arp2/3) followed by flowing

751 in a mixture of the same concentrations of actin, Arp2/3 complex, and 2.5  $\mu$ M CrPRF

752 (+CrPRF). (Right panel) CrFor1 bead is incubated with 1.5  $\mu$ M actin (10% Alexa-488

753 labeled) (Actin), followed by flowing in a mixture of actin and 2.5  $\mu$ M CrPRF (+CrPRF).

754 The bright flash in each movie indicates photobleaching, which helps observe new actin

755 assembly. Scale bar, 5  $\mu$ m. Time in sec.

756
