# Supplementary material for: Chlamydomonas reinhardtii formin FOR1 and profilin PRF1 are optimized for acute rapid actin filament assembly
Source: bioRxiv or medRxiv preprint supplement (doi:10.1101/096008), 2019-07-20
Supplement: Supplementary file [file media-1.pdf]

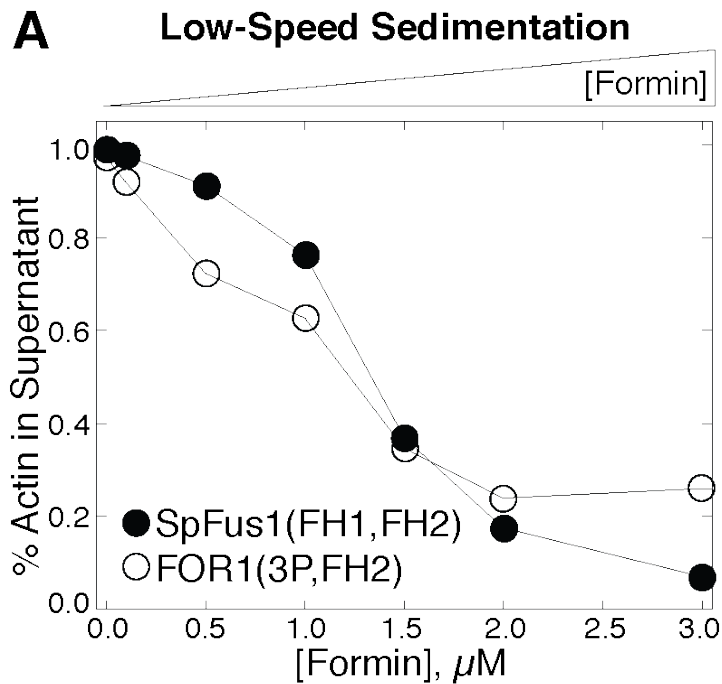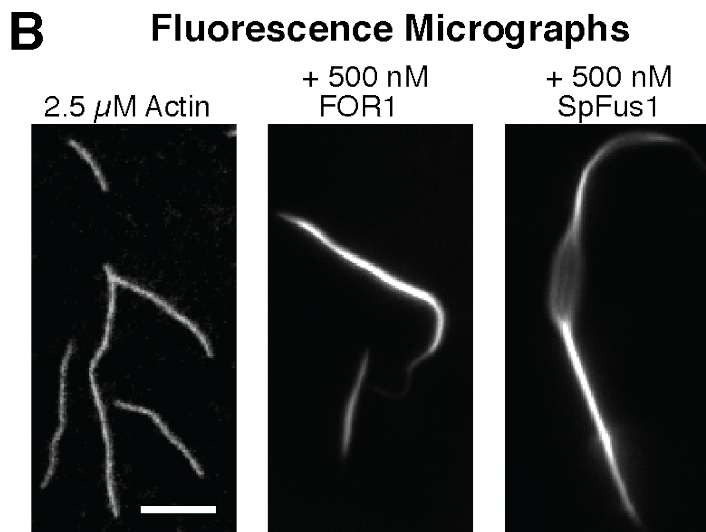

824

825 **Supplementary Figure S1: FOR1 bundles F-actin.**826 **(A)** Low speed (10,000  $\times g$ ) sedimentation of F-actin preassembled from 5  $\mu\text{M}$  Mg-ATP827 actin with a range of concentrations of FOR1 ( $\circ$ ) or fission yeast formin SpFus1 ( $\bullet$ ). Plot828 of the dependence of F-actin in the pellets on the concentration of FOR1 or SpFus1. **(B)**

829 Fluorescence micrographs of F-actin preassembled alone or in the presence of FOR1 or

830 SpFus1 for 20 min and stained with rhodamine-phalloidin. Scale bar, 5  $\mu\text{m}$ .

831

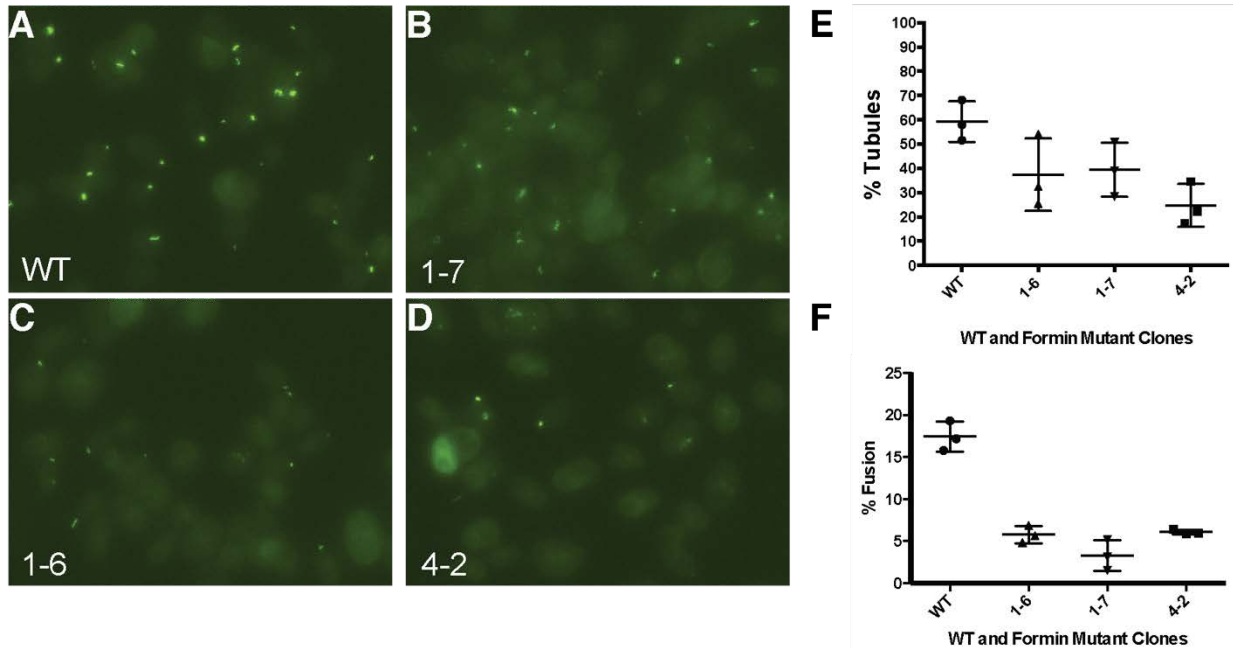

832  
833  
834  
835  
836  
837  
838  
839

**Supplementary Figure S2: Mutants of FOR2 have reduced rates of fertilization tubule formation and cell fusion.**

(A-D) Wild-type cells (A) and *for2* mutant isolates 1-7 (B), 1-6 (C), and 4-2 (D) stained with phalloidin-Alexa Fluor 488 to label actin-rich fertilization tubules. (E) Quantification of percentage of wild-type and *for2* cells that make fertilization tubules. (F) Quantification of percentage of wild-type and *for2* cells that fuse during mating.

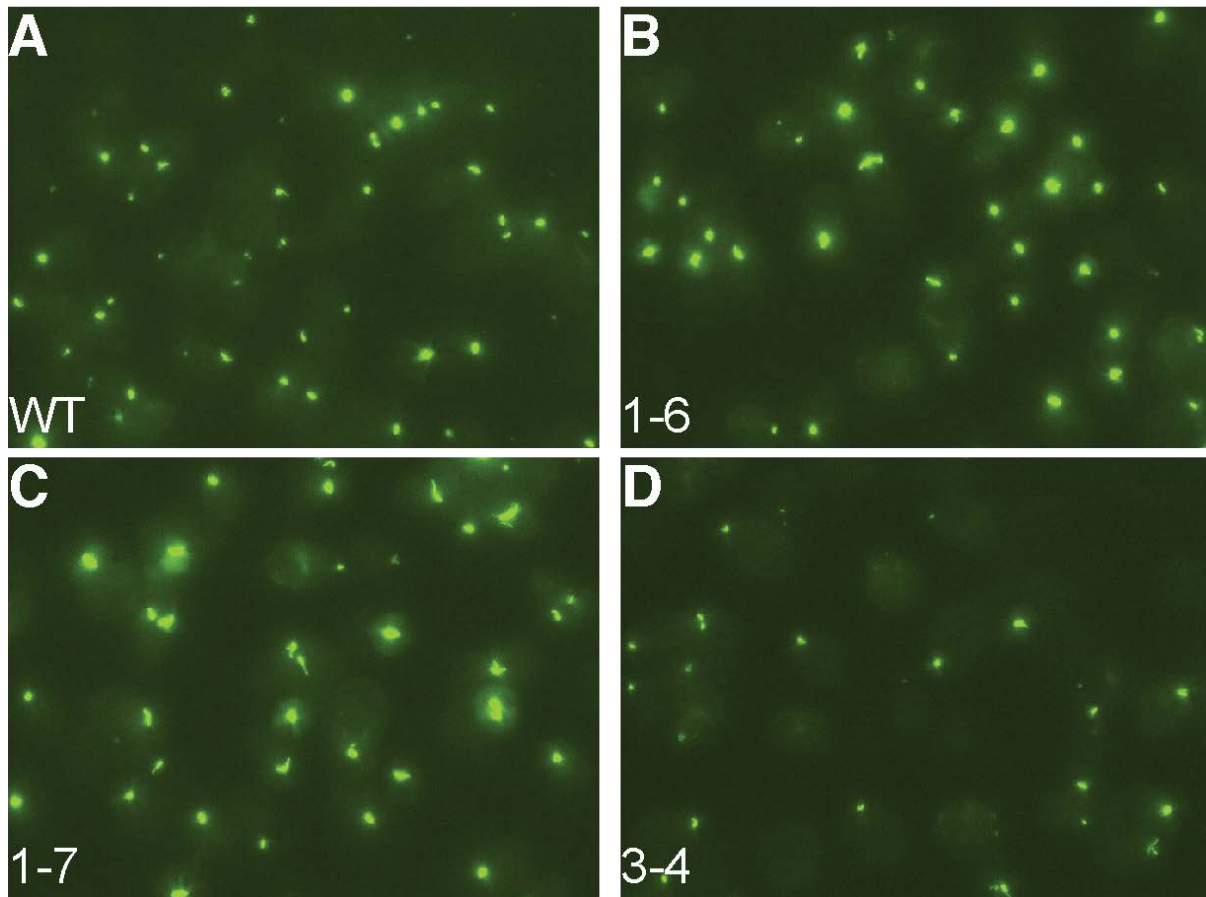

841

842

**Supplementary Figure S3: Mutants of FOR3 have no reduction in fertilization tubule formation.**

843

844

845

846

847

848

**(A-D)** Wild-type cells, 74% with fertilization tubules **(A)** and *for3* mutant isolates 1-6 with 77% fertilization tubules **(B)**, 1-7 with 74% fertilization tubules **(C)**, and 3-4 with 72% fertilization tubules **(D)** stained with phalloidin-Alexa Fluor 488 to label actin-rich fertilization tubules.

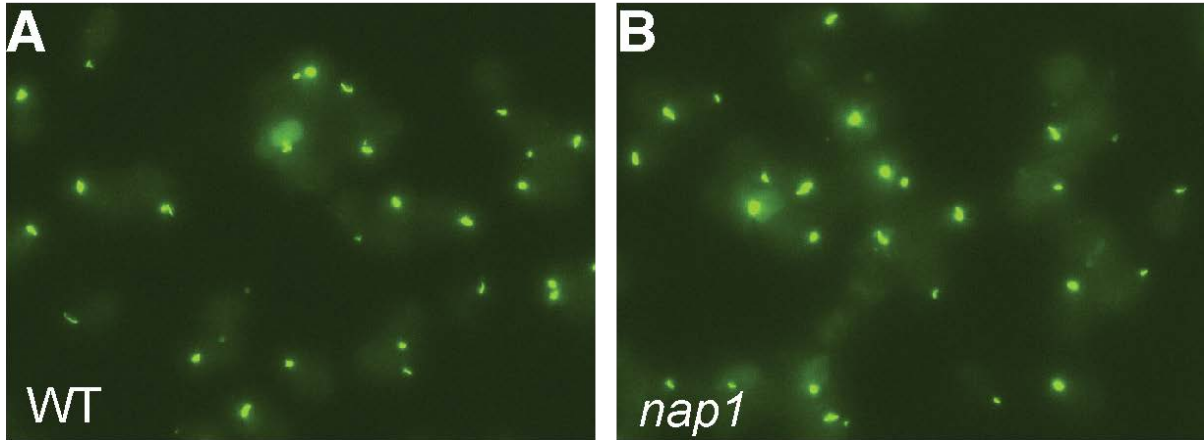

849

850

851

852

853

854

855

856

**Supplementary Figure S4: Mutants of NAP1 have unaffected fertilization tubule formation.**

**(A-B)** Wild-type and *nap1-1* cells stained with phalloidin-Alexa Fluor 488 to label actin-rich fertilization tubules.

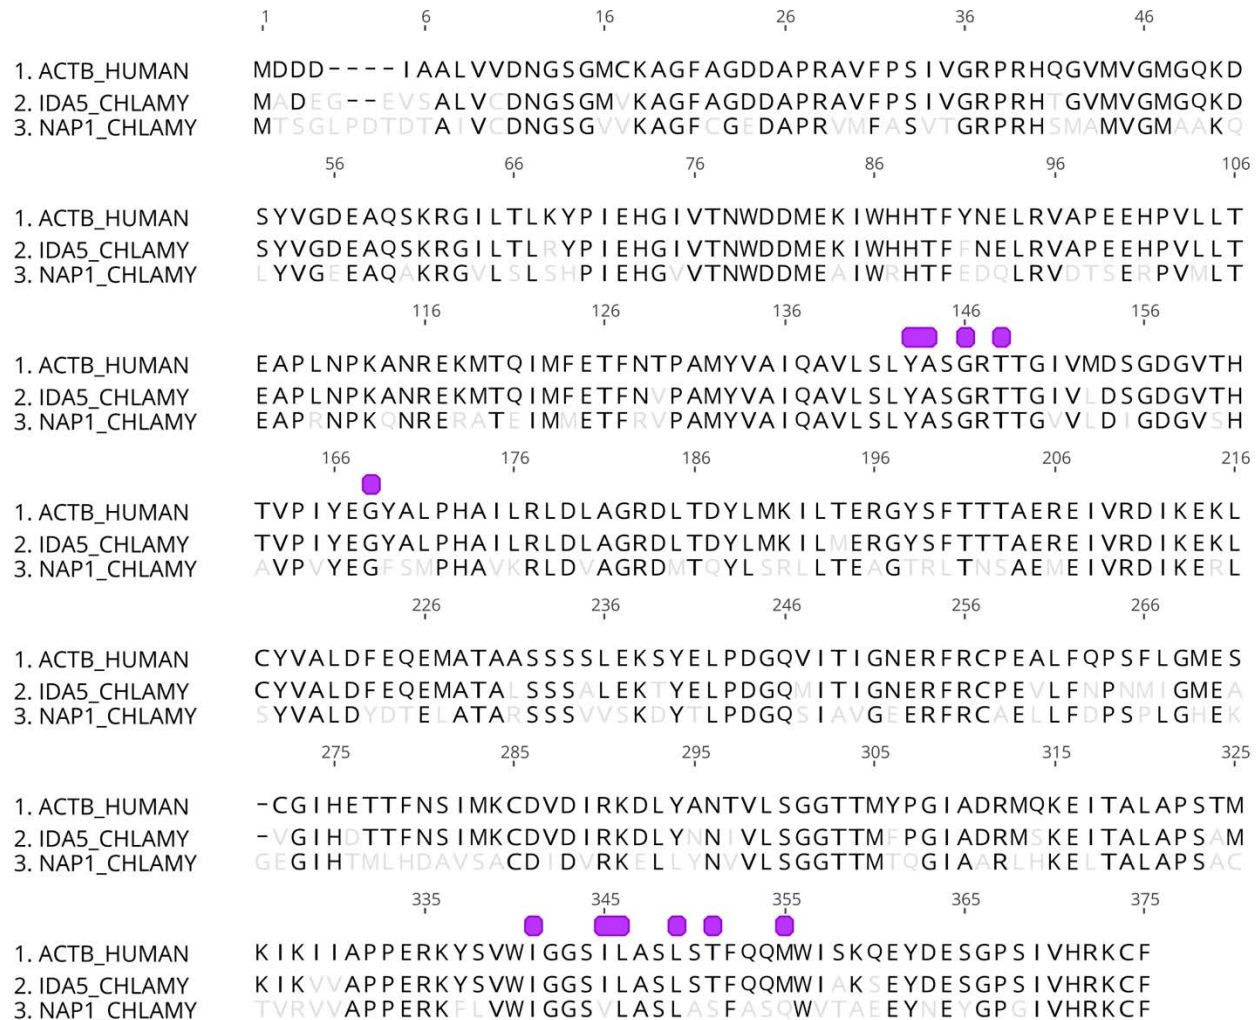

857  
858  
859  
860  
861  
862  
863  
864  
865

**Supplementary Figure S5: ClustalW alignment of human actin with *Chlamydomonas* actins.** The actin-binding FH2 domain of formin interacts with a hydrophobic cleft between actin subdomains 1 and 3 lined by the residues indicated in purple. Human actin is aligned with conventional (IDA5) and unconventional (NAP1) *Chlamydomonas* actin. Non-conserved residues are in light gray.

866 **Supplemental Movie Figure Legends:**

867

868 **Movie 1: PRF1 inhibits Arp2/3 complex-mediated actin assembly, related to Figure**

869 **6.** TIRF microscopy bead assays. Beads coated with fission yeast Wsp1 were incubated

870 with a series of components (listed in top left). Wsp1 bead is incubated with 1.5  $\mu$ M actin

871 (10% Alexa-488 labeled) and 30 nM Arp2/3 complex (Actin, Arp2/3) followed by flowing

872 in a mixture of the same concentrations of actin, Arp2/3 complex, and 2.5  $\mu$ M PRF1

873 (+PRF1). The bright flash in each movie indicates photobleaching, which allows

874 visualization of exclusively new actin assembly. Scale bar, 5  $\mu$ m. Time in sec.

875

876 **Movie 2: PRF1 promotes FOR1-mediated actin assembly, related to Figure 6.**

877 TIRF microscopy bead assays. Beads coated with FOR1(3P,FH2) were incubated with a

878 series of components (listed in top left of each movie). FOR1 bead is incubated with 1.5

879  $\mu$ M actin (10% Alexa-488 labeled) (Actin), followed by flowing in a mixture of actin and

880 2.5  $\mu$ M PRF1 (+PRF1). The bright flash indicates photobleaching, which allows

881 visualization of exclusively new actin assembly. Scale bar, 5  $\mu$ m. Time in sec.

882

883
